# Supplementary material for: Role of Nfu1 and Bol3 in iron-sulfur cluster transfer to mitochondrial clients
Source: eLife. 2016 Aug 17;5:e15991. doi: 10.7554/eLife.15991 (PMC5014551; doi:10.7554/eLife.15991)
Supplement: Figure 5—source data 1. — Bol1m is the H93C variant. Bol3m is the H101C variant. Nfu1m is the G/T>H variant. (Table 2) Spectral counts, unique peptides, and coverage of mitochondrial Fe-S client proteins (Aco1 and Lip5), Fe-S assembly machinery protein (Grx5) and the mitochondrial peroxiredoxin Prx1 comparing two unique biological replicates by affinity purification and subsequent MS analysis. Bol1m is the H93C variant. Bol3m is the H101C variant. Nfu1m is the G/T>H variant. Prx1 was a reproducible interactor with Bol1, but the significance of this interaction remains to be established. DOI: http://dx.doi.org/10.7554/eLife.15991.011 [file elife-15991-fig5-data1.xlsx]

## Sheet: Figure 5 source data 1
Table 1
Fe-S Clients	Bait>		Bol1			Bol1 Mutant			Bol3			Bol3 Mutant			Nfu1			Nfu1 Mutant			WT
	Target	Spectral Counts	Unique peptides	Coverage (%)	Spectral Counts	Unique peptides	Coverage (%)	Spectral Counts	Unique peptides	Coverage (%)	Spectral Counts	Unique peptides	Coverage (%)	Spectral Counts	Unique peptides	Coverage (%)	Spectral Counts	Unique peptides	Coverage (%)	Spectral Counts	Unique peptides	Coverage (%)
	Sdh2	0	0	0	0	0	0	13	10	0.278	10	7	0.278	7	6	0.177	11	8	0.256	0	0	0
	Lip5	0	0	0	0	0	0	3	3	0.099	3	3	0.126	9	8	0.266	15	9	0.319	0	0	0
	Bio2	0	0	0	0	0	0	2	2	0.075	8	6	0.16	4	4	0.133	12	7	0.205	0	0	0
	Aco1	7	7	0.107	3	3	0.058	21	16	0.283	48	29	0.35	48	27	0.321	88	35	0.296	2	2	0.041
	Lys4	0	0	0	0	0	0	2	2	0.043	6	6	0.134	0	0	0	12	6	0.102	0	0	0
	Aco2	0	0	0	0	0	0	0	0	0	2	2	0.033	3	3	0.047	14	11	0.193	0	0	0
	Ilv3	5	5	0.137	0	0	0	19	15	0.318	55	33	0.482	10	9	0.258	33	20	0.304	0	0	0
	Rip1	0	0	0	0	0	0	4	4	0.184	0	0	0	0	0	0	0	0	0	0	0	0
Bait	Bait >		Bol1			Bol1 Mutant			Bol3			Bol3 Mutant			Nfu1			Nfu1 Mutant			WT
	Target	Spectral Counts	Unique peptides	Coverage (%)	Spectral Counts	Unique peptides	Coverage (%)	Spectral Counts	Unique peptides	Coverage (%)	Spectral Counts	Unique peptides	Coverage (%)	Spectral Counts	Unique peptides	Coverage (%)	Spectral Counts	Unique peptides	Coverage (%)	Spectral Counts	Unique peptides	Coverage (%)
	Bol1	30	13	0.827	34	10	0.536	0	0	0	0	0	0	0	0	0	0	0	0	0	0	0
	Bol3	0	0	0	0	0	0	53	17	0.585	36	10	0.441	0	0	0	0	0	0	0	0	0
	Nfu1	0	0	0	0	0	0	0	0	0	4	4	0.145	213	22	0.605	152	20	0.5	0	0	0
Fe-S Machinery	Bait >		Bol1			Bol1 Mutant			Bol3			Bol3 Mutant			Nfu1			Nfu1 Mutant			WT
	Target	Spectral Counts	Unique peptides	Coverage (%)	Spectral Counts	Unique peptides	Coverage (%)	Spectral Counts	Unique peptides	Coverage (%)	Spectral Counts	Unique peptides	Coverage (%)	Spectral Counts	Unique peptides	Coverage (%)	Spectral Counts	Unique peptides	Coverage (%)	Spectral Counts	Unique peptides	Coverage (%)
	Grx5	16	10	0.52	2	2	0.18	7	4	0.307	6	5	0.307	3	3	0.28	0	0	0	0	0	0
	Isa2	0	0	0	0	0	0	0	0	0	3	2	0.2	0	0	0	3	3	0.265	0	0	0
	Nfs1	0	0	0	2	2	0.05	2	2	0.058	4	4	0.141	0	0	0	3	3	0.105	0	0	0
Table 2
	Bait >		Bol1			Bol1 Mutant			Bol3			Bol3 Mutant			Nfu1			Nfu1 Mutant			WT
Target	Replicate	Spectral Counts	Unique peptides	Coverage (%)	Spectral Counts	Unique peptides	Coverage (%)	Spectral Counts	Unique peptides	Coverage (%)	Spectral Counts	Unique peptides	Coverage (%)	Spectral Counts	Unique peptides	Coverage (%)	Spectral Counts	Unique peptides	Coverage (%)	Spectral Counts	Unique peptides	Coverage (%)
Grx5	1	16	10	0.52	2	2	0.18	7	4	0.307	6	5	0.307	3	3	0.28	0	0	0	0	0	0
	2	28	10	0.593	31	9	0.52	1	1	0.107	7	6	0.427	0	0	0	0	0	0	0	0	0
Aco1	1	7	7	0.107	3	3	0.058	21	16	0.283	48	29	0.35	48	27	0.321	88	35	0.296	2	2	0.041
	2	2	2	0.035	13	6	0.111	0	0	0	15	8	0.164	30	8	0.09	31	11	0.168	0	0	0
Lip5	1	0	0	0	0	0	0	3	3	0.099	3	3	0.126	9	8	0.266	15	9	0.319	0	0	0
	2	0	0	0	0	0	0	0	0	0	0	0	0	0	0	0	3	2	0.126	0	0	0
Prx1	1	18	10	0.383	18	10	0.326	10	6	0.207	9	6	0.207	10	7	0.28	7	5	0.199	0	0	0
	2	16	7	0.368	23	9	0.318	0	0	0	2	2	0.111	3	1	0.061	0	0	0	0	0	0
