# Supplementary material for: Role of Nfu1 and Bol3 in iron-sulfur cluster transfer to mitochondrial clients
Source: eLife journal article supplement (doi:10.7554/elife.15991), 2016-08-17
Supplement: figures [file elife-15991-figures-v2.pdf]

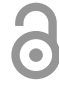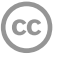

---

## Figures and figure supplements

Role of Nfu1 and Bol3 in iron-sulfur cluster transfer to mitochondrial clients

**Andrew Melber et al**

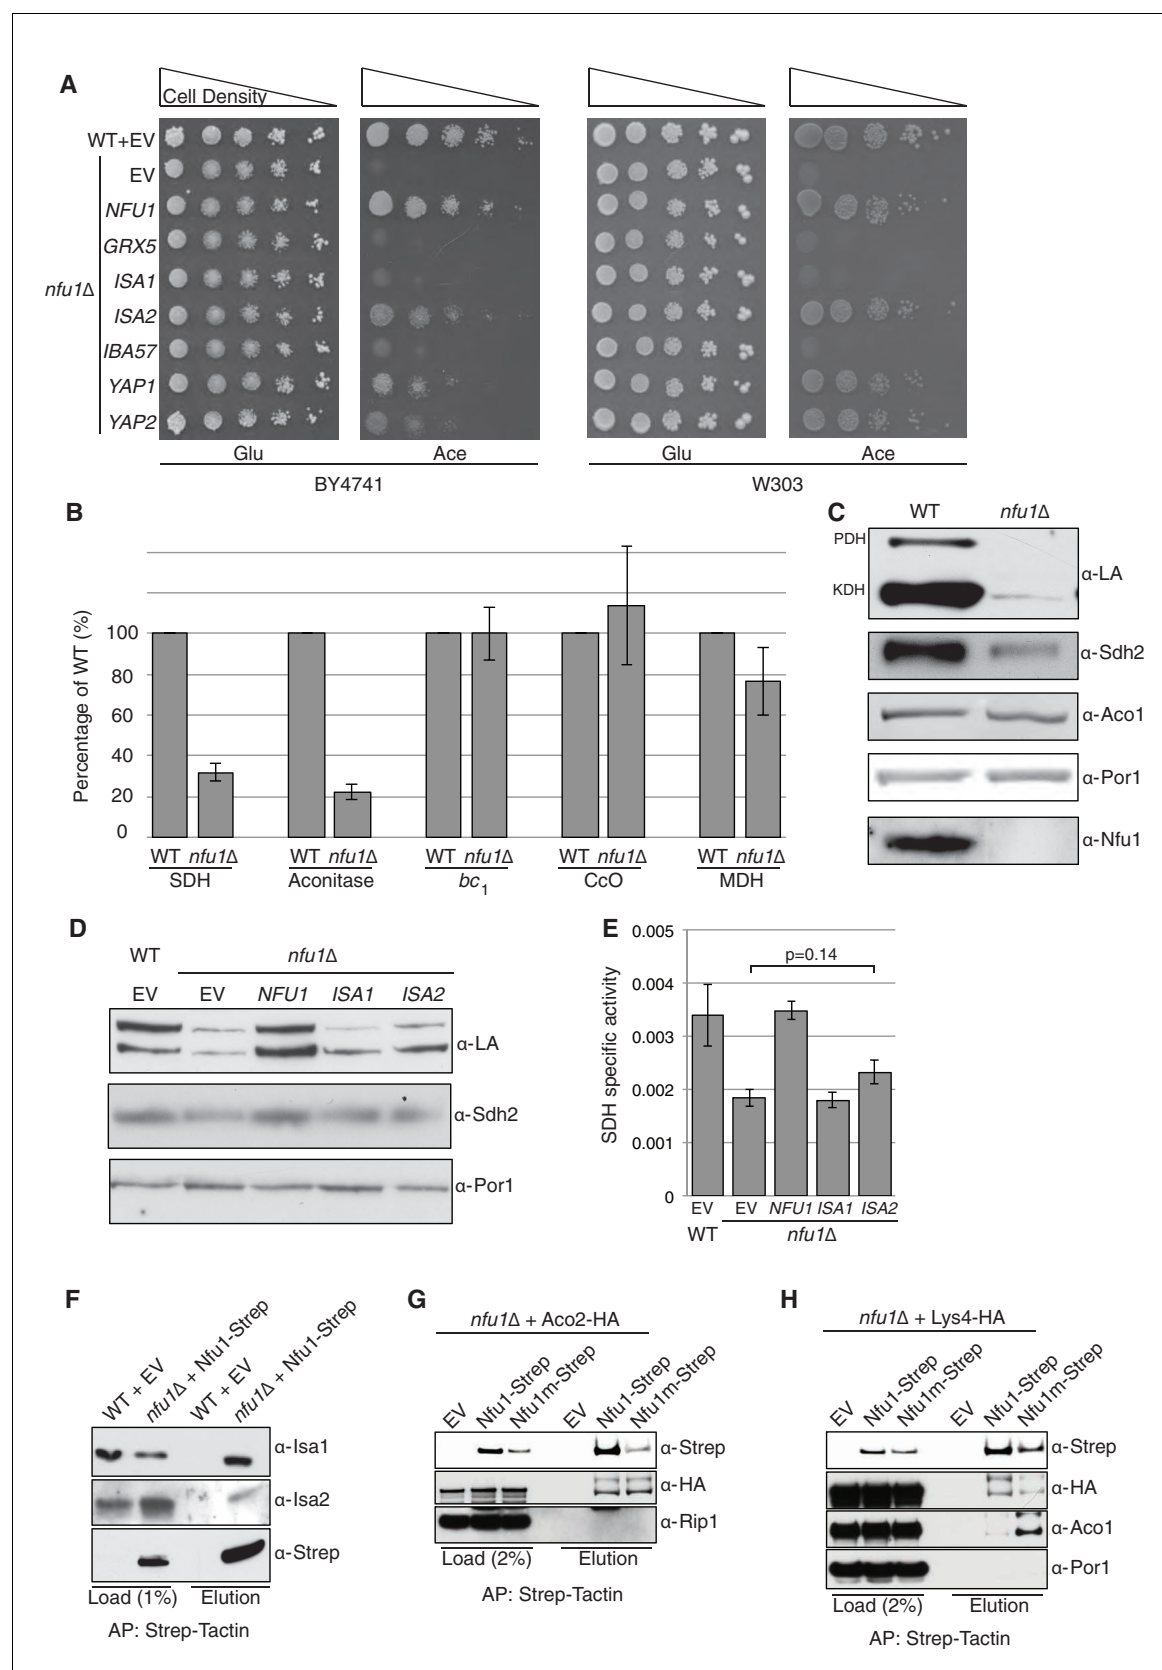

**Figure 1.** Nfu1 functions with both the ISA [4Fe-4S] assembly complex and [4Fe-4S] client proteins. Cells lacking Nfu1 exhibit defects in [4Fe-4S] cluster enzymes in mitochondria. (A) Respiratory growth defects revealed by yeast drop-test. Cells harboring empty vectors (EV) or high-copy plasmids

Figure 1 continued on next page

## Figure 1 continued

expressing designated genes were pre-cultured in liquid synthetic complete (SC) glucose media lacking uracil. Serially diluted cells (10-fold) were spotted on SC media plates at 30°C. Grx5 is a monothiol glutaredoxin involved in mitochondrial Fe-S biogenesis. Isa1, Isa2 and Iba57 are subunits of the ISA scaffold complex required for [4Fe-4S] cluster synthesis. Yap1 is a transcription factor that induces expression of anti-oxidant genes. Glu is 2% glucose and Ace is 2% acetate. (B) The relative activity of aconitase, SDH, cytochrome *bc*<sub>1</sub>, cytochrome *c* oxidase (CcO), and malate dehydrogenase (MDH) were measured in isolated mitochondria from cells cultured in SC media with 2% raffinose. Data are shown as mean  $\pm$  SE (n = 3) (CcO, n = 4). (C) Steady-state protein levels measured by SDS-PAGE followed by immunoblotting in isolated mitochondria. Anti-LA antibody is an antibody specific to lipoic acid (LA) that is conjugated to proteins. PDH is pyruvate dehydrogenase and KDH is  $\alpha$ -ketoglutarate dehydrogenase. Sdh2 is the Fe-S cluster subunit of SDH. Aco1 is mitochondrial aconitase. Por1 is a mitochondrial loading control. (D) Restoration of LA moieties on PDH and KDH shown by SDS-PAGE followed by immunoblotting in isolated mitochondria from *nfu1* $\Delta$  cells over-expressing *ISA1* and *ISA2*. (E) Enzymatic activity of SDH in mitochondria isolated from *nfu1* $\Delta$  cells over-expressing *ISA1* and *ISA2*. Data are shown as mean  $\pm$  SE (n = 3). (F) Strep-tag affinity purification of Nfu1-Strep revealed the Nfu1 interaction with Isa1 and Isa2. Mitochondria were solubilized with 0.1% n-dodecyl maltoside (DDM). Clarified lysates were incubated with Strep-Tactin superflow beads for 16 hr. After washing, proteins were eluted with 2.5 mM desthiobiotin, and then analyzed by immunoblotting. (G) Strep-tag affinity purification of Nfu1-Strep in the presence of ectopically expressed Aco2-HA. Nfu1m-Strep is the G/T>H mutant described in **Figure 4**. (H) Strep-tag affinity purification of Nfu1-Strep in the presence of ectopically expressed Lys4-HA. Lys4 and Aco2 are both nuclear DNA-encoded mitochondrial proteins that require a [4Fe-4S] cluster for each function in the lysine biosynthetic pathway in yeast. Nfu1m-Strep is the G/T>H mutant described in **Figure 4**.

DOI: [10.7554/eLife.15991.003](https://doi.org/10.7554/eLife.15991.003)

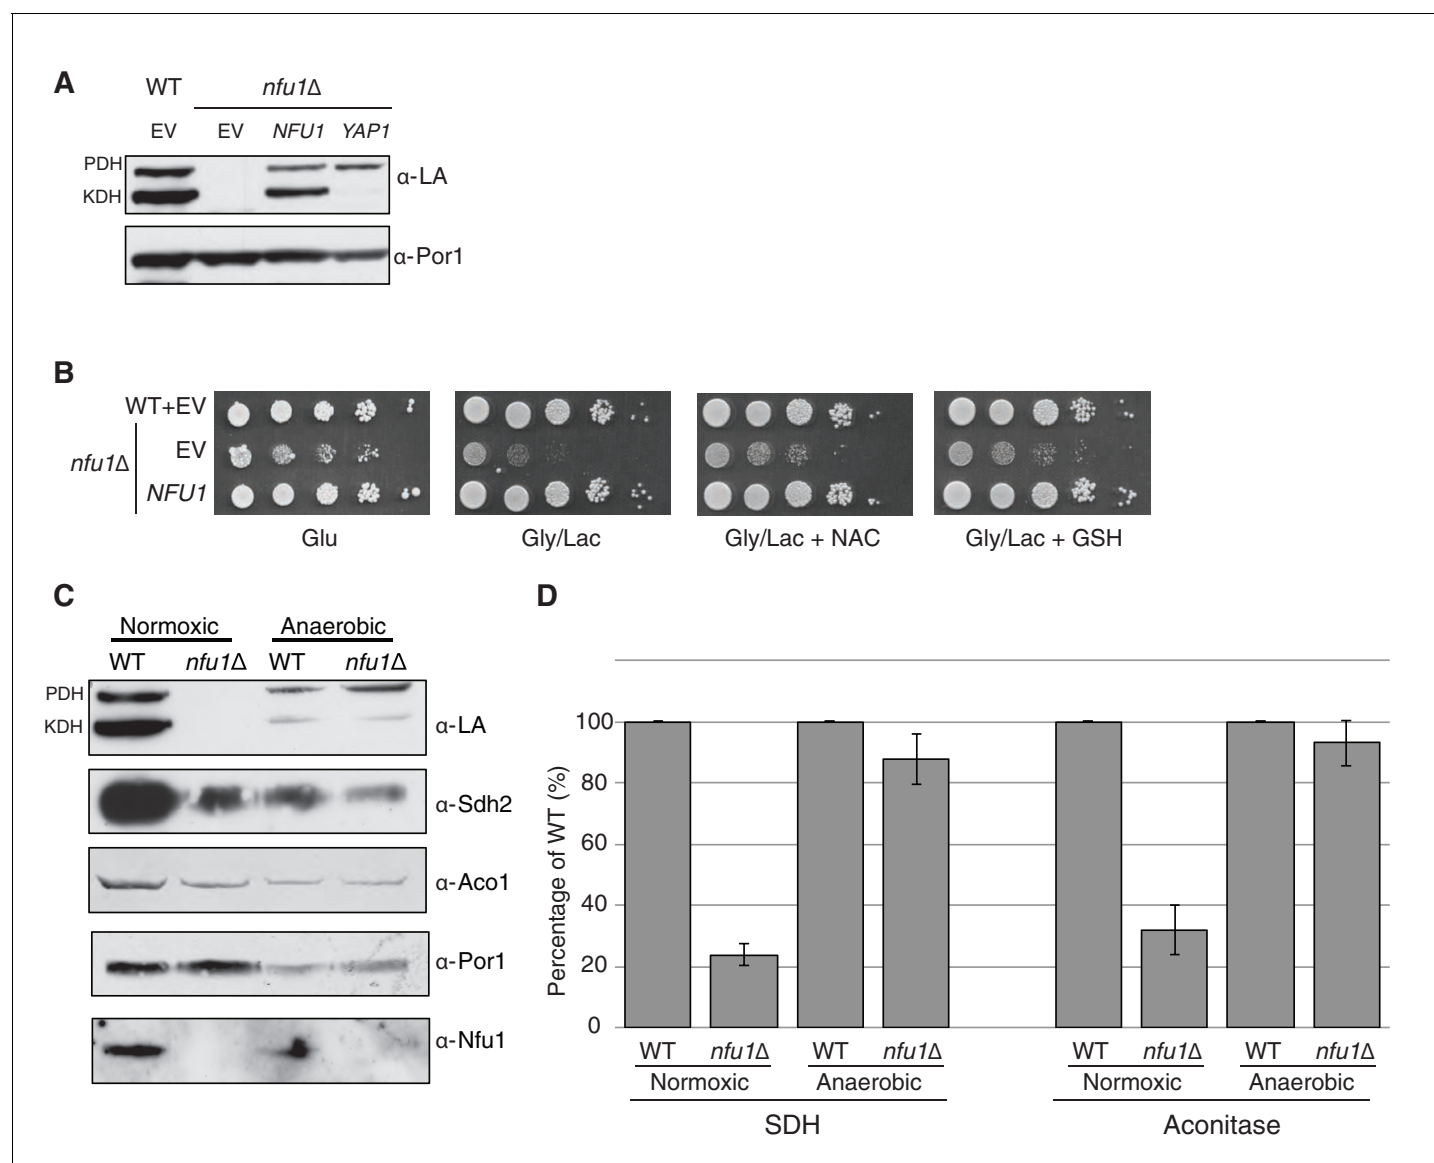

**Figure 2.** Nfu1 has a heightened importance during times of oxidative stress and is expendable in anoxic conditions. Defects in cells lacking Nfu1 are pronounced under oxidative stress conditions. (A) Steady-state levels of proteins in isolated mitochondria from *nfu1Δ* cells harboring high-copy *NFU1* plasmids or *YAP1* plasmids. (B) Yeast drop-test with 5 mM n-acetyl cysteine (NAC) and 2 mM glutathione (GSH). Gly/Lac is SC medium with 2% glycerol and 2% lactate as carbon sources. (C) Steady-state levels of proteins in isolated mitochondria from cells cultured under normoxic conditions or anaerobic conditions. (D) Relative activity of SDH and aconitase in mitochondria from panel C. Data are shown as mean  $\pm$  SE (n = 3).

DOI: 10.7554/eLife.15991.004

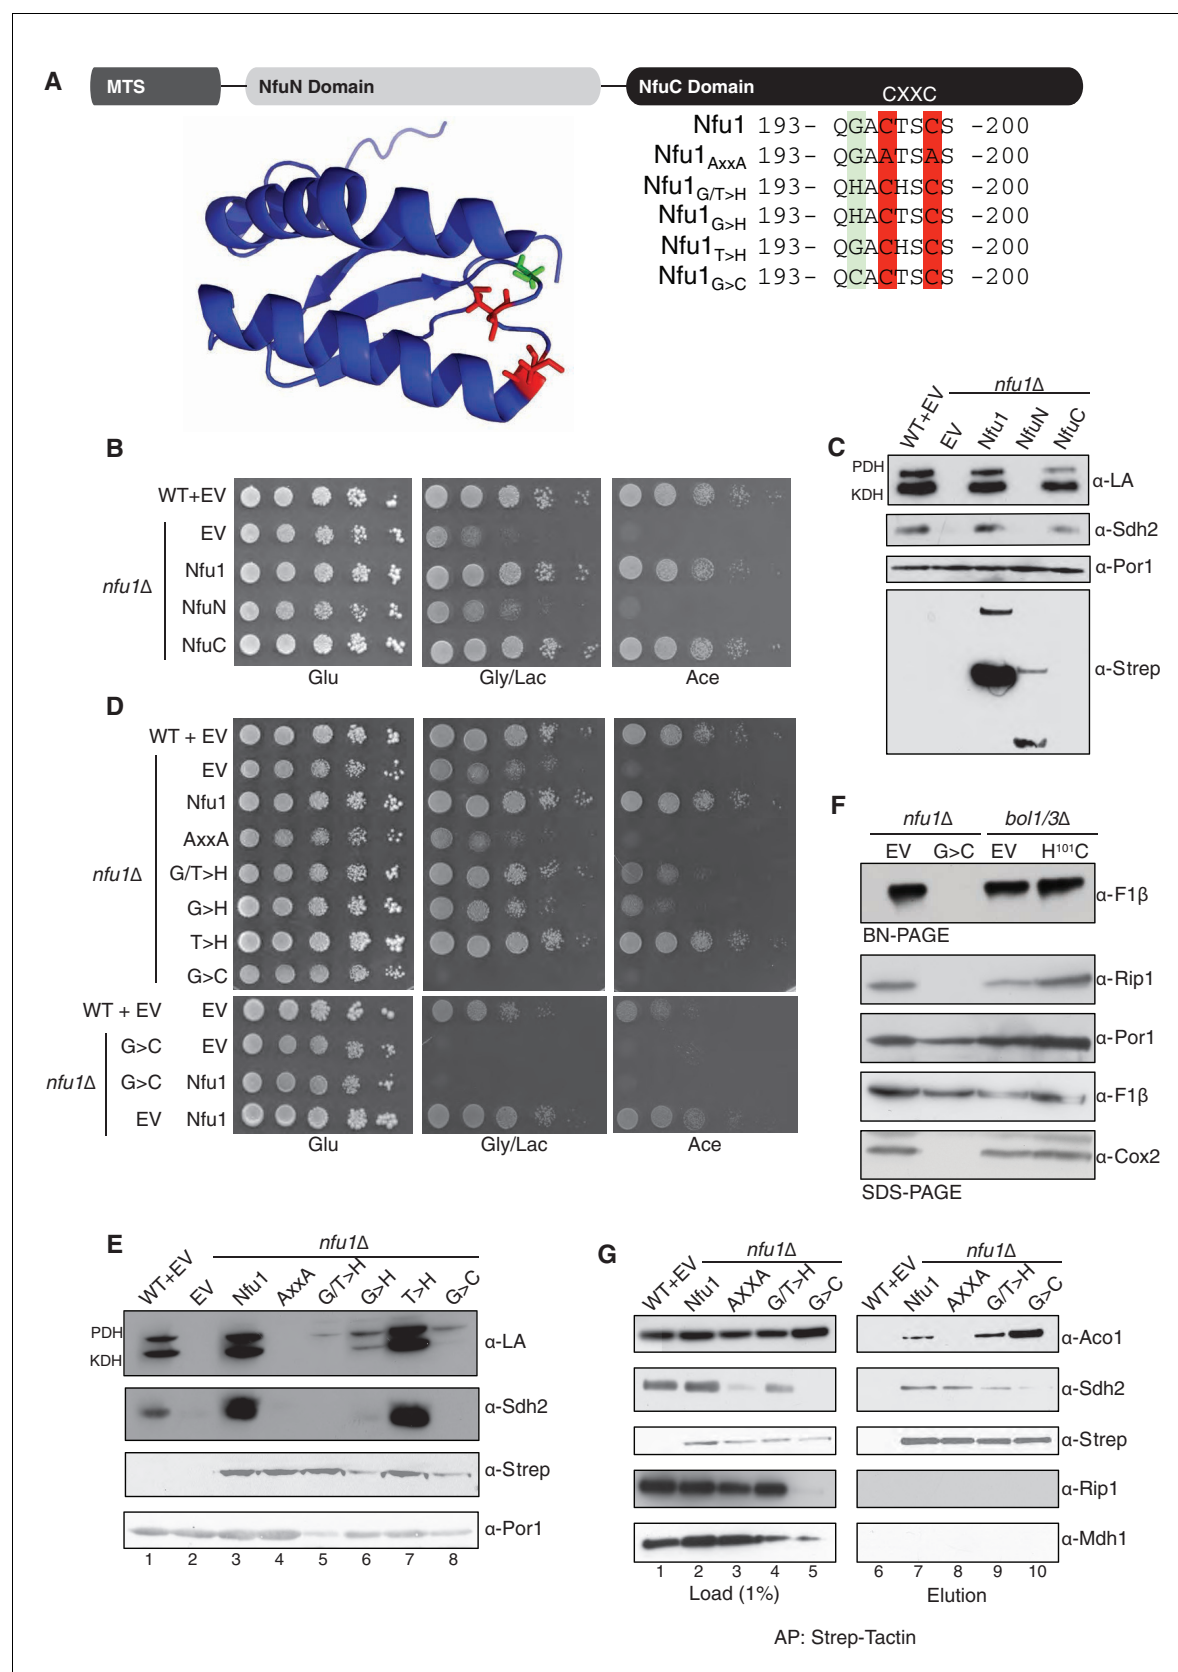

**Figure 3.** The CxxC motif of C-terminal domain of Nfu1 is essential for function. The CxxC motif is critical for Nfu1 function. (A) A schematic representation of Nfu1 domains. MTS, the mitochondrial targeting sequence; NfuN, the N-terminal domain of Nfu1; NfuC, the C-terminal domain

Figure 3 continued on next page

## Figure 3 continued

harboring the highly conserved CxxC motif. The human NfuC tertiary structure (PDB: 2M5O) and primary sequences showing the CxxC motif (red) and adjacent amino acids indicated in partial sequences (green). (B) The respiratory growth defect of *nfu1Δ* cells was rescued with NfuC. Nfu1, NfuN, and NfuC were all fused with a C-terminal Strep-tag and expressed exogenously using low-copy plasmids. (C) Restoration of Nfu1 target proteins by NfuC expression in *nfu1Δ* cells. (D) Respiratory growths of *nfu1Δ* cells that express Nfu1 sequence variants were tested. All variants were fused with a Strep-tag and expressed on low-copy plasmids. (E) Steady-state levels of LA-conjugated proteins and Sdh2 in *nfu1Δ* cells that express Nfu1 variants. (F) BN-PAGE and SDS-PAGE analysis of [4Fe-4S] cluster independent enzymes in the dominant negative backgrounds *nfu1Δ* + G>C and *bol1/3Δ* + H<sup>101</sup>C. (G) Strep-tag purification of Nfu1 sequence variants as described in **Figure 3B** immunoblotting for [4Fe-4S] cluster client proteins Aco1 and Sdh2.

DOI: [10.7554/eLife.15991.005](https://doi.org/10.7554/eLife.15991.005)

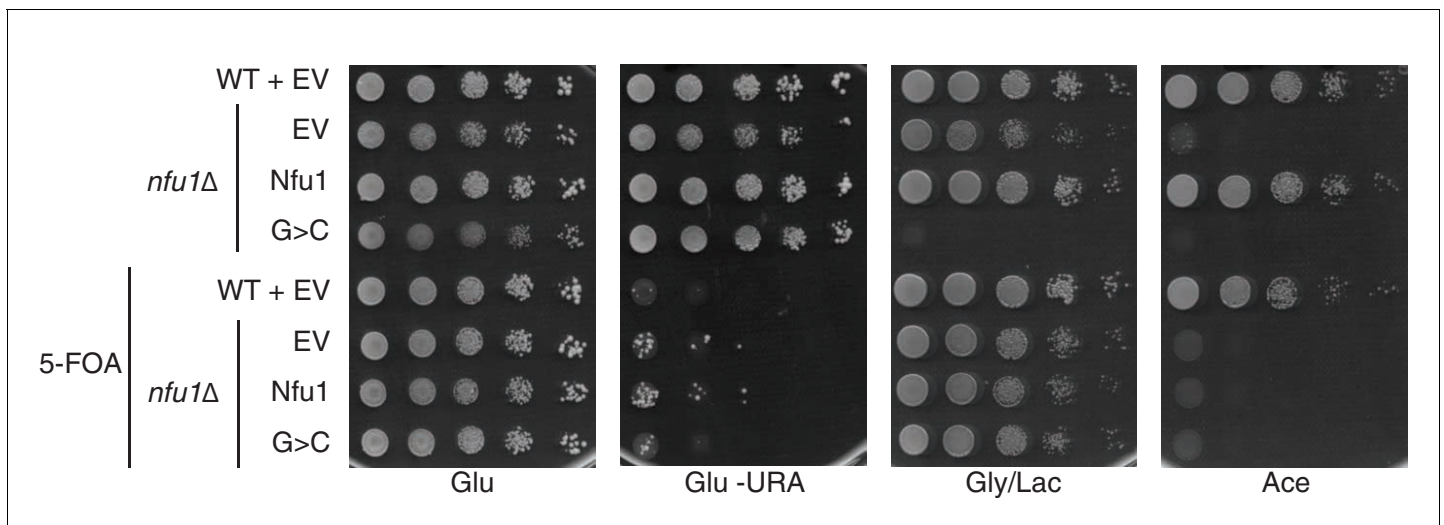

**Figure 3—figure supplement 1.** Yeast growth tests evaluating respiratory growth (Gly/Lac) of *nfu1Δ* + G>C cells following treatment with 5'-Fluoroorotic acid (5-FOA) to show cells have not lost their mitochondrial DNA (rho<sup>+</sup>). 5-FOA was used to induce shedding of the pRS416 vector. Glu-URA is SC media with 2% glucose lacking Uracil to show the successful loss of the pRS416 vector.

DOI: [10.7554/eLife.15991.006](https://doi.org/10.7554/eLife.15991.006)

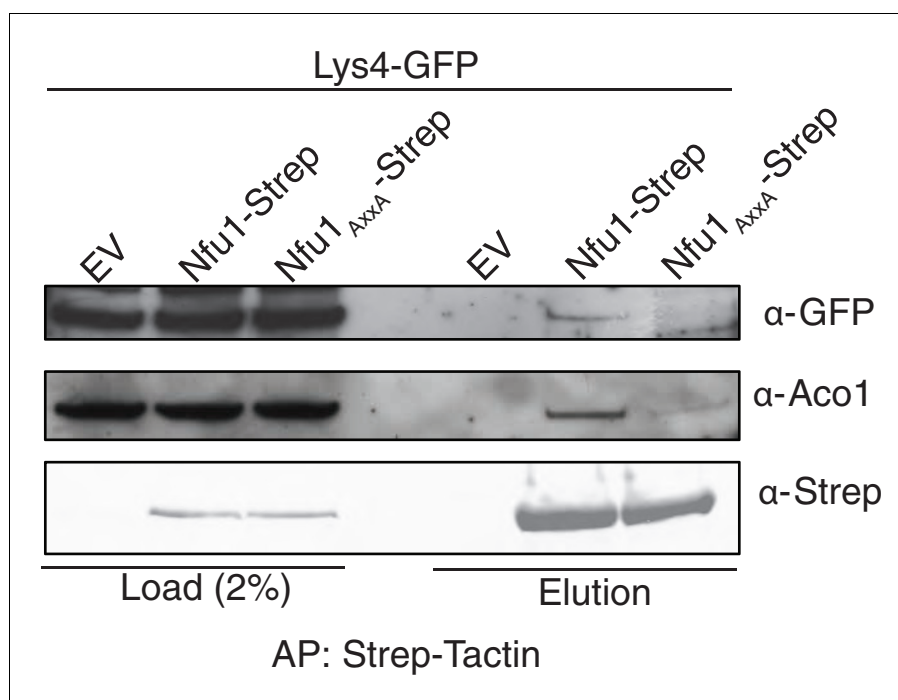

**Figure 3—figure supplement 2.** Affinity purification using Strep-Tactin to immobilize Strep tagged Nfu1 and the Nfu1 AxxA variant expressed ectopically in the BY4743 background with a single copy of Lys4 chromosomally tagged with GFP.

DOI: [10.7554/eLife.15991.007](https://doi.org/10.7554/eLife.15991.007)



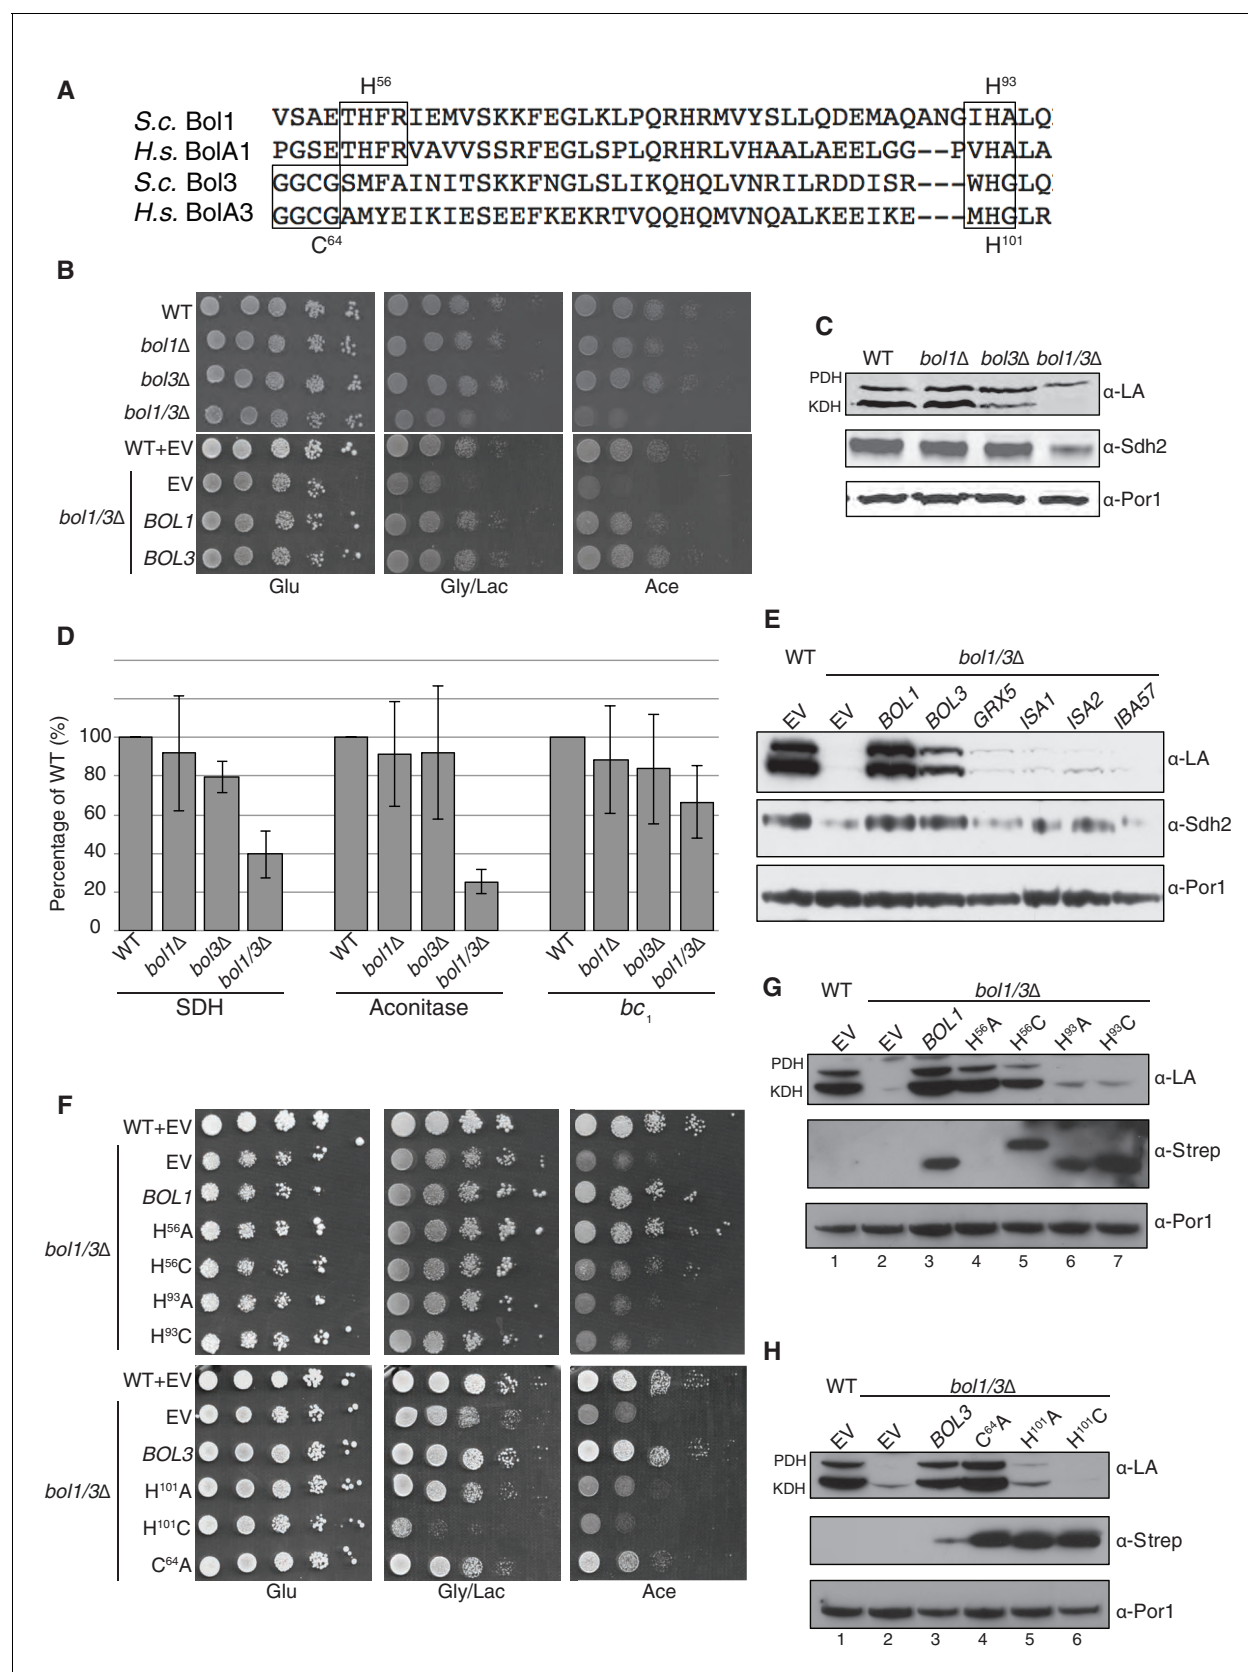

**Figure 4.** The Mitochondrial Bol1 and Bol3 proteins function in Fe-S biogenesis. Bol1 and Bol3 play roles in Fe-S cluster biogenesis in mitochondria (A) Partial sequences of yeast and human mitochondrial BolA proteins. Boxed are conserved motifs with proposed ISC ligands that were mutated in this Figure 4 continued on next page

## Figure 4 continued

work. (B) Respiratory growth defects of *bol1Δ* cells, *bol3Δ* cells and *bol1Δbol3Δ* double mutants and complementation by plasmid-borne *BOL1* or *BOL3*. (C) Steady-state levels of LA-conjugated proteins and Sdh2 in cells lacking Bol1 and/or Bol3. (D) Relative activity of SDH, cytochrome *bc*<sub>1</sub> complex and aconitase were measured. Data are shown as mean ± SE (n=3). (E) Observation of LA moieties on PDH and KDH and Sdh2 steady-state levels by SDS-PAGE followed by immunoblotting in isolated mitochondria from *bol1/3Δ* cells over-expressing the indicated Fe-S cluster gene. (F) Respiratory function of Bol1 and Bol3 sequence variants in conserved residues were examined by yeast drop-test. All Bol1 variants were fused with a C-terminal Strep-tag and expressed on low-copy plasmids. All Bol3 variants were fused with a N-terminal Strep-tag between the MTS and the remainder of the protein and expressed on low-copy plasmids. (G and H) Steady-state levels of LA-conjugated proteins in cells lacking Bol1 and Bol3 with Bol1 variants (G) and Bol3 variants (H) exogenously expressed.

DOI: [10.7554/eLife.15991.008](https://doi.org/10.7554/eLife.15991.008)

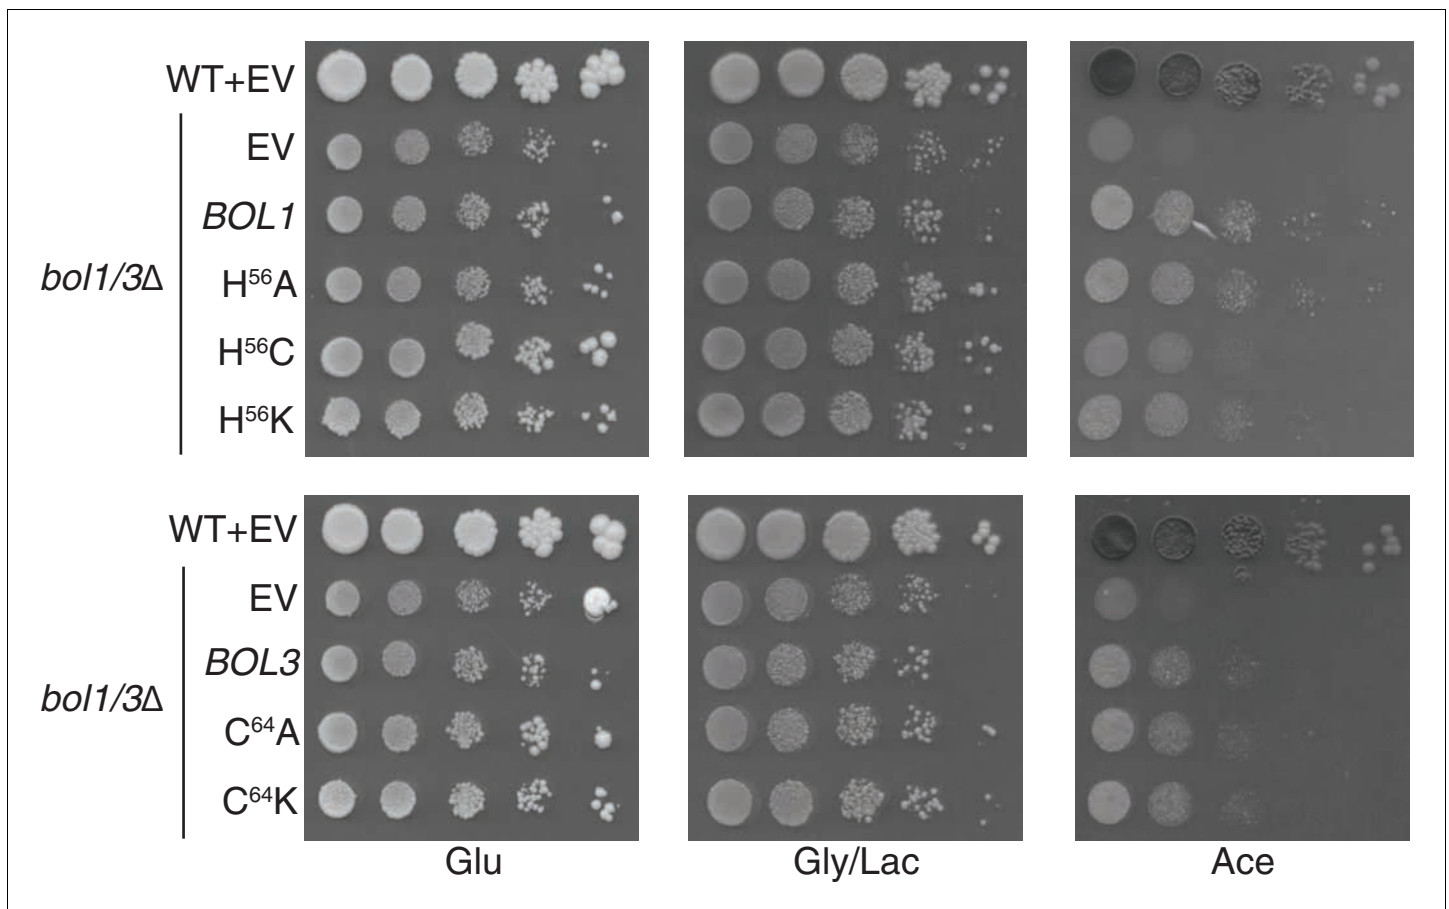

**Figure 4—figure supplement 1.** Yeast growth tests evaluating the viability of cells expressing mitochondrial Bol1 and Bol3 N-terminal ligands mutated to lysine in the *bol1/3Δ* background.

DOI: [10.7554/eLife.15991.009](https://doi.org/10.7554/eLife.15991.009)

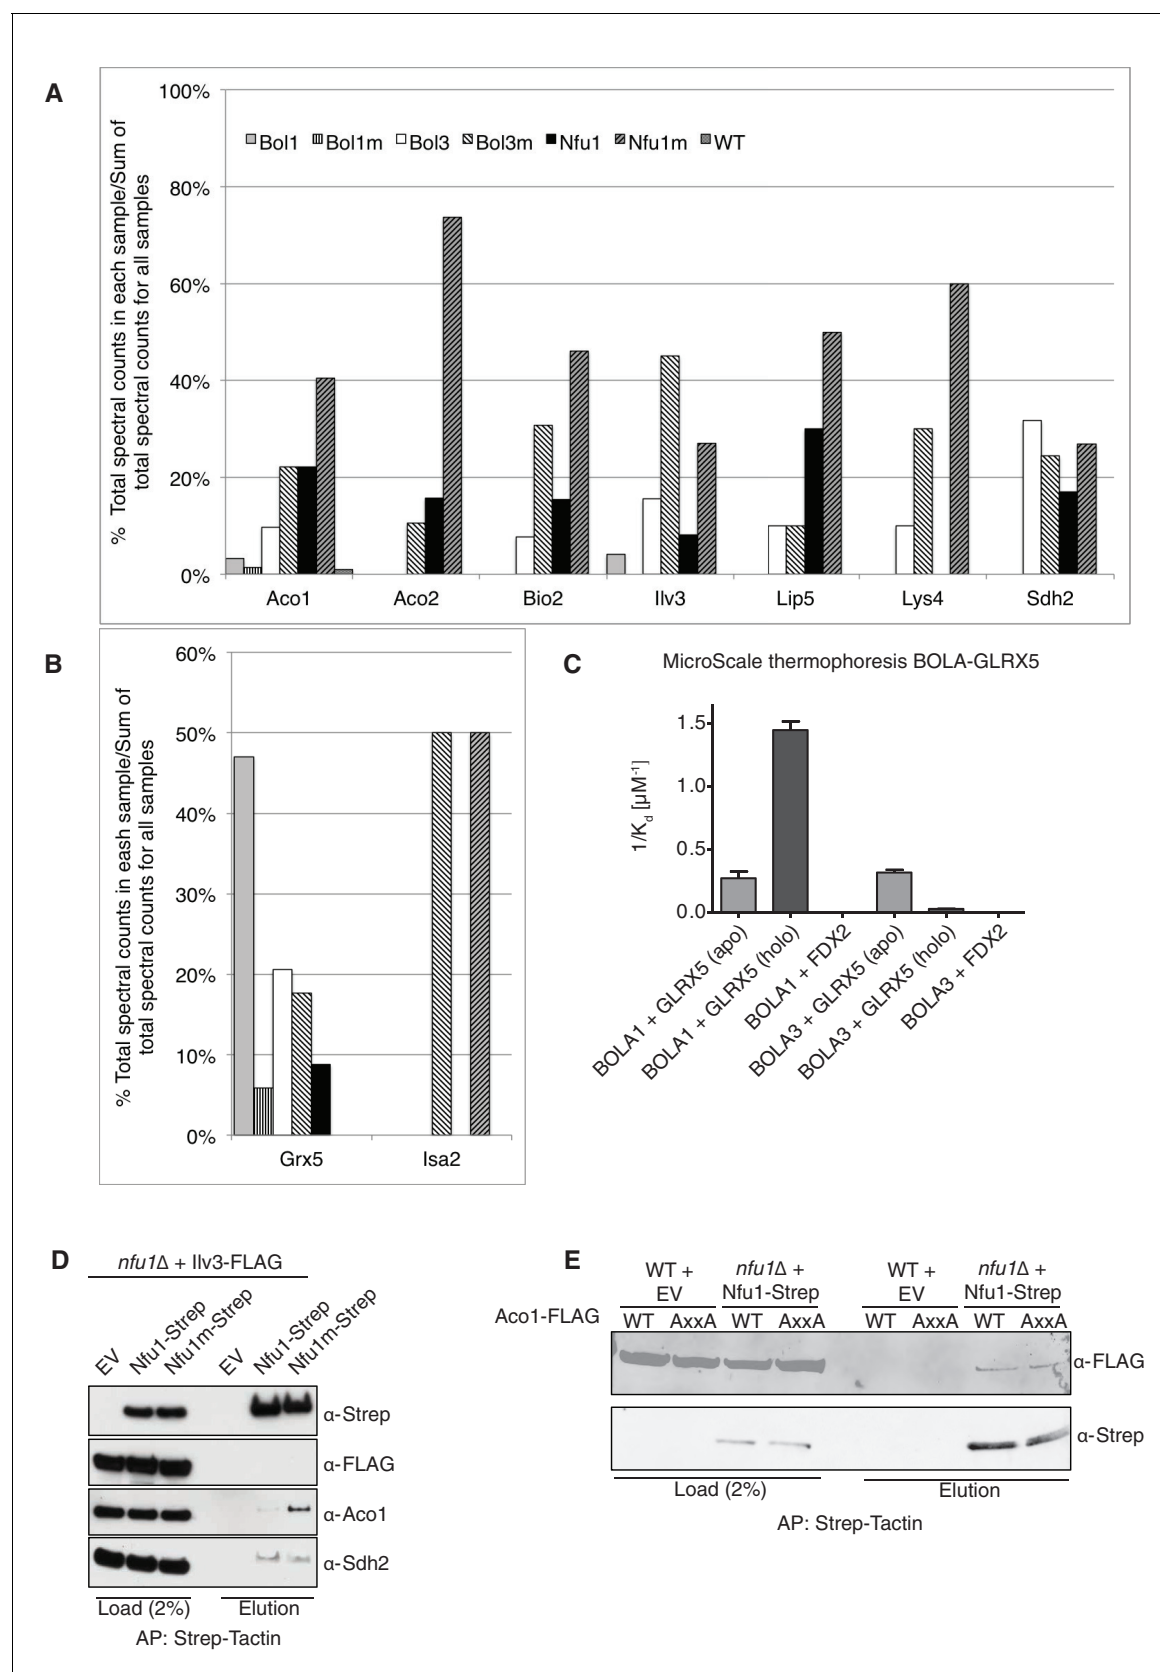

**Figure 5.** Proteomic analysis of Nfu1, Bol1 and Bol3 establishes function within mitochondrial Fe-S for Bol1 and Bol3. (A and B) Percentages of spectral counts identified by MS proteomics. Percentages were calculated by the number of spectral counts identified for a denoted protein in an individual

Figure 5 continued on next page

## Figure 5 continued

Strep-tagged protein divided by the total number of spectral counts for that protein identified from all seven samples. Strep-tagged proteins were expressed from low-copy plasmids in corresponding single deletion mutants. Samples were Strep-affinity purified as in **Figure 3**. Bol1m is the H93C variant. Bol3m is the H<sup>101</sup>C variant. Nfu1m is the G/T>H variant. WT is wild-type BY4741 expressing an empty vector. All were fused with a C-terminal Strep-tag. WT is BY4741 wild type harboring a low-copy empty plasmid. (C) Human GLRX5 or NFU1 were used in apo- and holo- form and mixed at increasing concentrations with 200 nM fluorescently labelled BOLA1 or BOLA3. Microscale thermophoresis were performed and dissociation constants ( $K_d$ ) were determined. Error bars indicate the SD (n=3). (D) Strep-tag affinity purification of Nfu1-Strep in the presence of ectopically expressed Ilv3-FLAG. (E) Affinity purification using Strep-Tactin agarose beads to purify Nfu1-Strep from an *nfu1Δ* background expressing either WT Aco1 or Aco1 AxxA mutant.

DOI: [10.7554/eLife.15991.010](https://doi.org/10.7554/eLife.15991.010)

The following source data is available for figure 5:

**Source data 1.** (Table 1) Spectral counts, unique peptides, and coverage of mitochondrial Fe-S client proteins, bait proteins, and Fe-S assembly machinery identified by MS proteomics.

DOI: [10.7554/eLife.15991.011](https://doi.org/10.7554/eLife.15991.011)

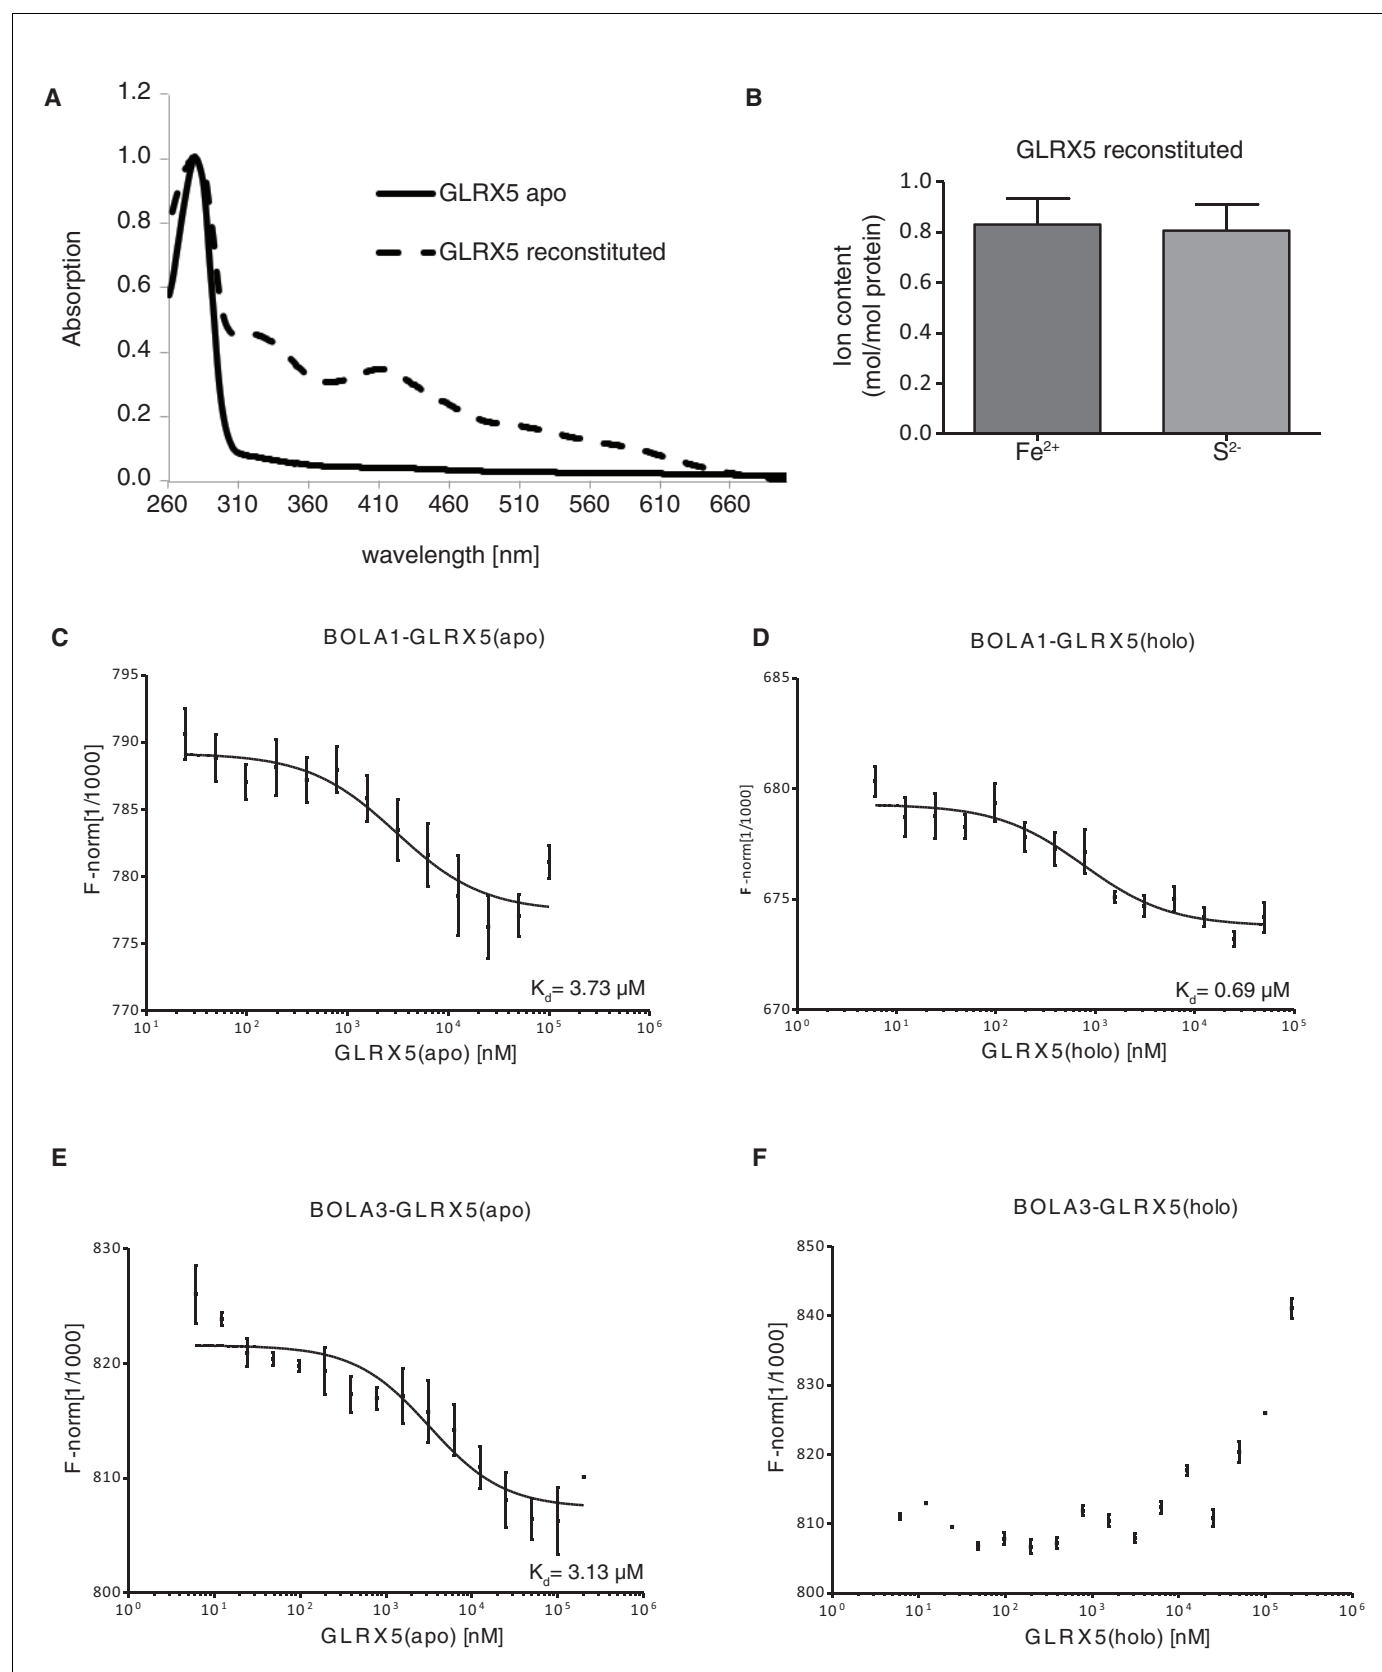

**Figure 5—figure supplement 1.** Interaction studies of human BOLA proteins with GLRX5. (A) UV-visible absorption spectrum of apo-GLRX5 (black line) and chemically reconstituted GLRX5 (dashed line). Reconstituted human GLRX5 (100  $\mu\text{M}$ ) showed absorption bands at 320 nm and 425 nm besides Figure 5—figure supplement 1 continued on next page

*Figure 5—figure supplement 1 continued*

the protein absorption at 280 nm, characteristic for the [2Fe-2S] cluster bound to GLRX5. (B) Iron and sulfide determination of chemically reconstituted GLRX5. Reconstituted human GLRX5 contains about 0.85  $\text{Fe}^{2+}$  and 0.8  $\text{S}^{2-}$  per monomer indicating a bridging [2Fe-2S] cluster between two GLRX5 monomers. (C–F) Quantification of the interaction between the human apo- or holo-GLRX5 and the BOLA proteins. Microscale thermophoresis was performed using the indicated fluorescently labeled human BOLA proteins and apo-GLRX5 (C;E) or holo-GLRX5 (D;F).

DOI: [10.7554/eLife.15991.012](https://doi.org/10.7554/eLife.15991.012)

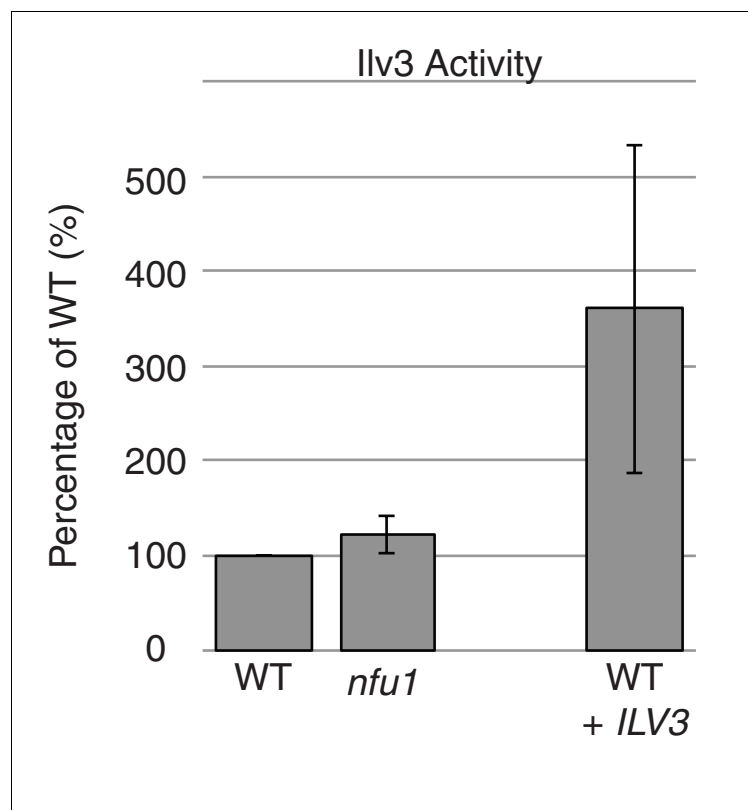

**Figure 5—figure supplement 2.** Ilv3 activity assay using wild-type and *nfu1* $\Delta$  purified mitochondria along with wild-type overexpressing Ilv3 as a control.

DOI: [10.7554/eLife.15991.013](https://doi.org/10.7554/eLife.15991.013)



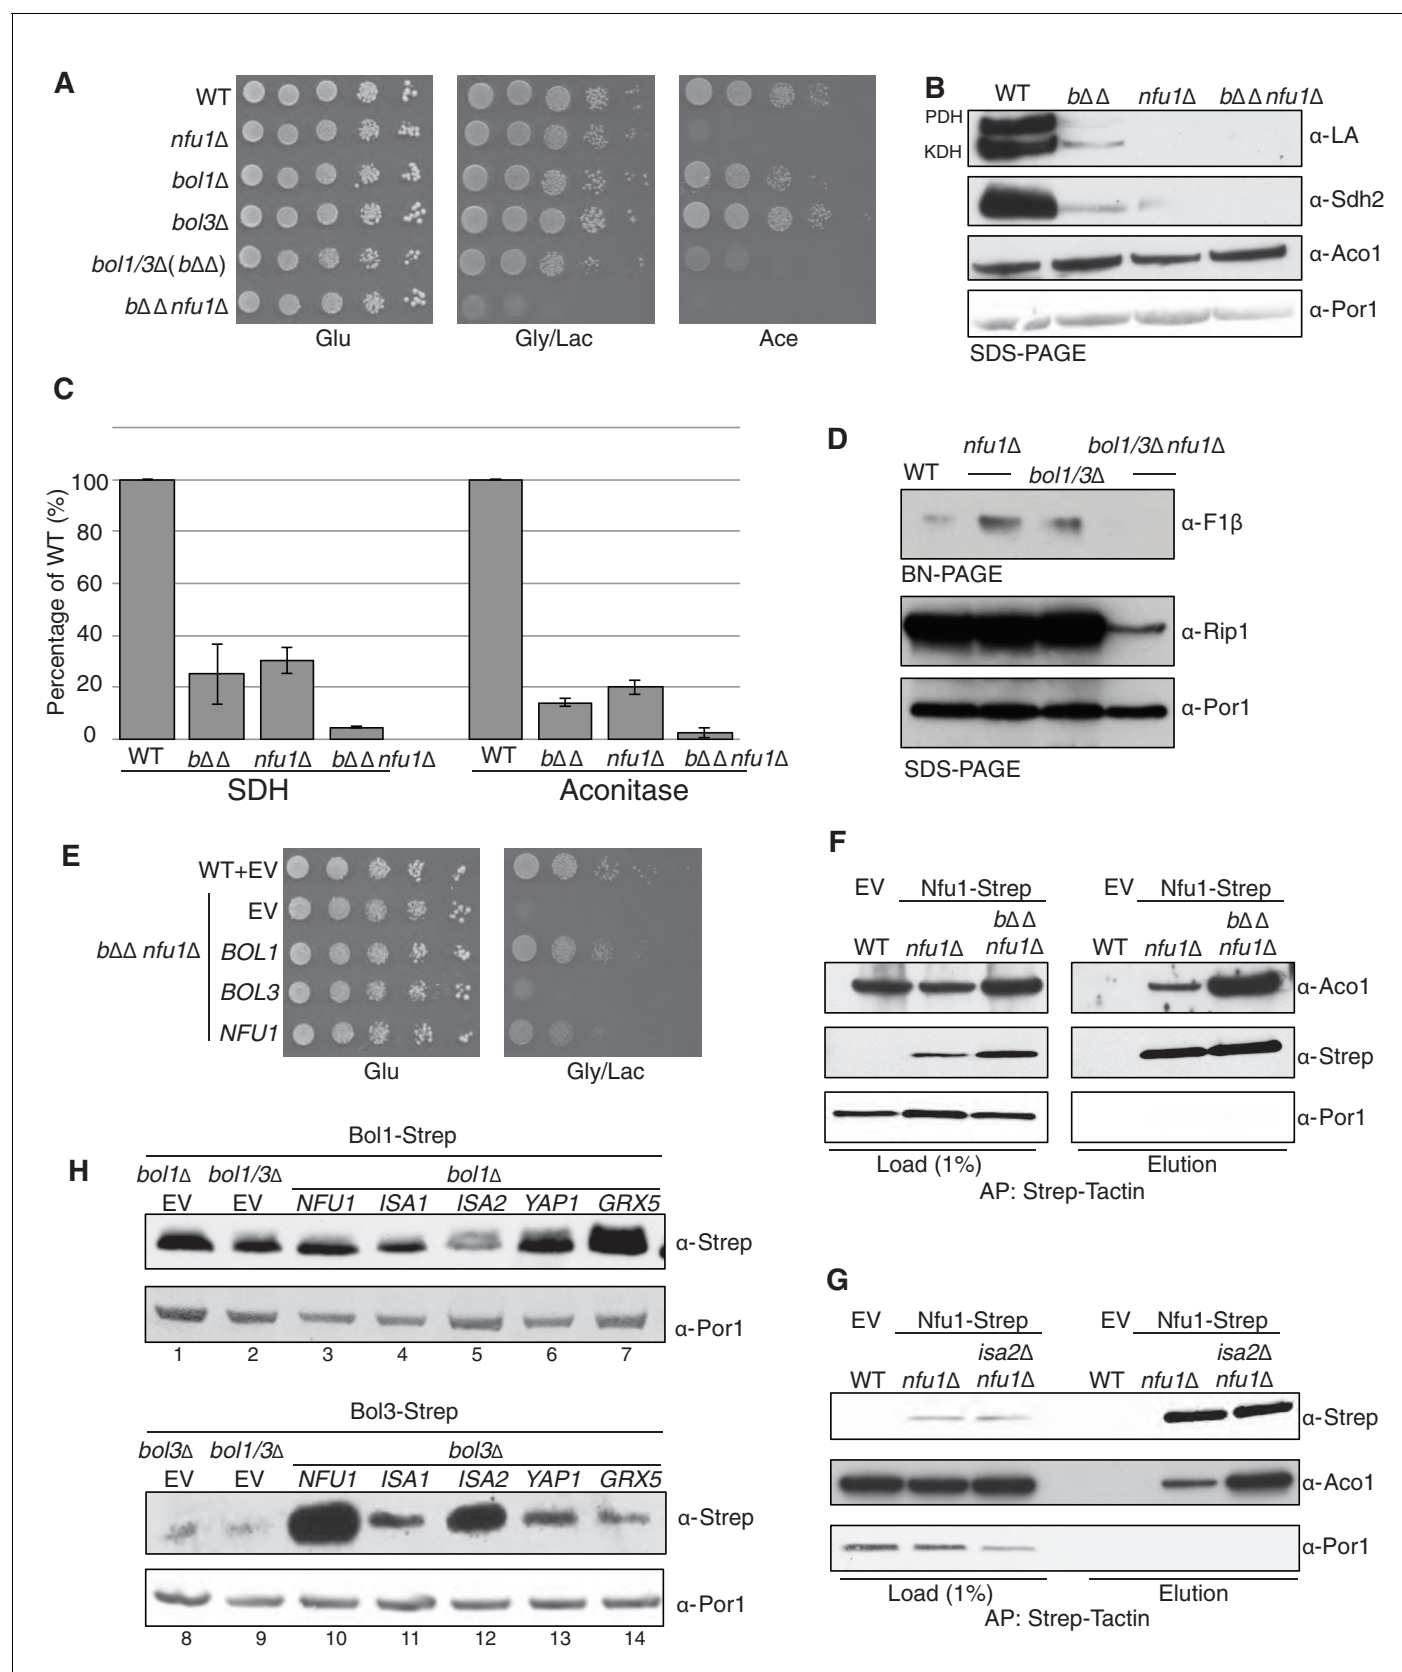

**Figure 6.** Nfu1 and Bol3 function together in [4Fe-4S] delivery. (A) Exacerbated respiratory growth defects of *bol1Δbol3Δnfu1Δ* triple mutants (designated *bΔΔnfu1Δ*) compared to *nfu1Δ* single mutants and *bol1Δbol3Δ* double mutants on non-fermentable carbon sources. (B) Steady-state levels of [4Fe-4S] cluster in WT, *bΔΔ*, *nfu1Δ*, and *bΔΔ nfu1Δ* strains. (C) Quantification of [4Fe-4S] cluster levels in WT, *bΔΔ*, *nfu1Δ*, and *bΔΔ nfu1Δ* strains. (D) Steady-state levels of α-F1β, α-Rip1, and α-Por1 in WT, *nfu1Δ*, and *bol1/3Δ nfu1Δ* strains. (E) Spot assay showing growth of WT+EV, EV, *bΔΔ nfu1Δ*, *bΔΔ nfu1Δ BOL1*, *bΔΔ nfu1Δ BOL3*, and *bΔΔ nfu1Δ NFU1* on Glu and Gly/Lac media. (F) Western blot showing steady-state levels of α-Aco1, α-Strep, and α-Por1 in EV, Nfu1-Strep, *bΔΔ*, and WT *nfu1Δ* strains. (G) Western blot showing steady-state levels of α-Strep, α-Aco1, and α-Por1 in EV, Nfu1-Strep, *isa2Δ*, and WT *nfu1Δ* strains. (H) Western blot showing steady-state levels of α-Strep and α-Por1 in *bol1Δ*, *bol1/3Δ*, and *bol3Δ* strains with EV, NFU1, ISA1, ISA2, YAP1, and GRX5. NFU1, ISA1, and ISA2 show improved growth on non-fermentable carbon sources compared to EV.

## Figure 6 continued

of LA-conjugated proteins and Sdh2 in the absence of Bol1, Bol3 or Nfu1. (C) Relative activity of SDH and aconitase in the absence of Bol1, Bol3 or Nfu1. Data are shown as mean  $\pm$  SE (n=3) (D) BN-PAGE and SDS-PAGE analysis of [4Fe-4S] cluster independent enzymes in the *b $\Delta\Delta$ nfu1 $\Delta$*  triple deletion mutant background. F1 $\beta$  is a subunit of ATP synthase. (E) Respiratory growth of *b $\Delta\Delta$ nfu1 $\Delta$*  triple mutants harboring plasmid-borne *BOL1*, *BOL3* and *NFU1*, respectively. (F) Strep-tag purification of Nfu1-Strep in the absence of Bol1 and Bol3. (G) Strep-tag purification of Nfu1-Strep in the absence of Isa2. (H) Steady-state levels of Bol1-Strep (upper panel) and Bol3-Strep (bottom panel) in response to overexpression of genes as indicated.

DOI: [10.7554/eLife.15991.014](https://doi.org/10.7554/eLife.15991.014)

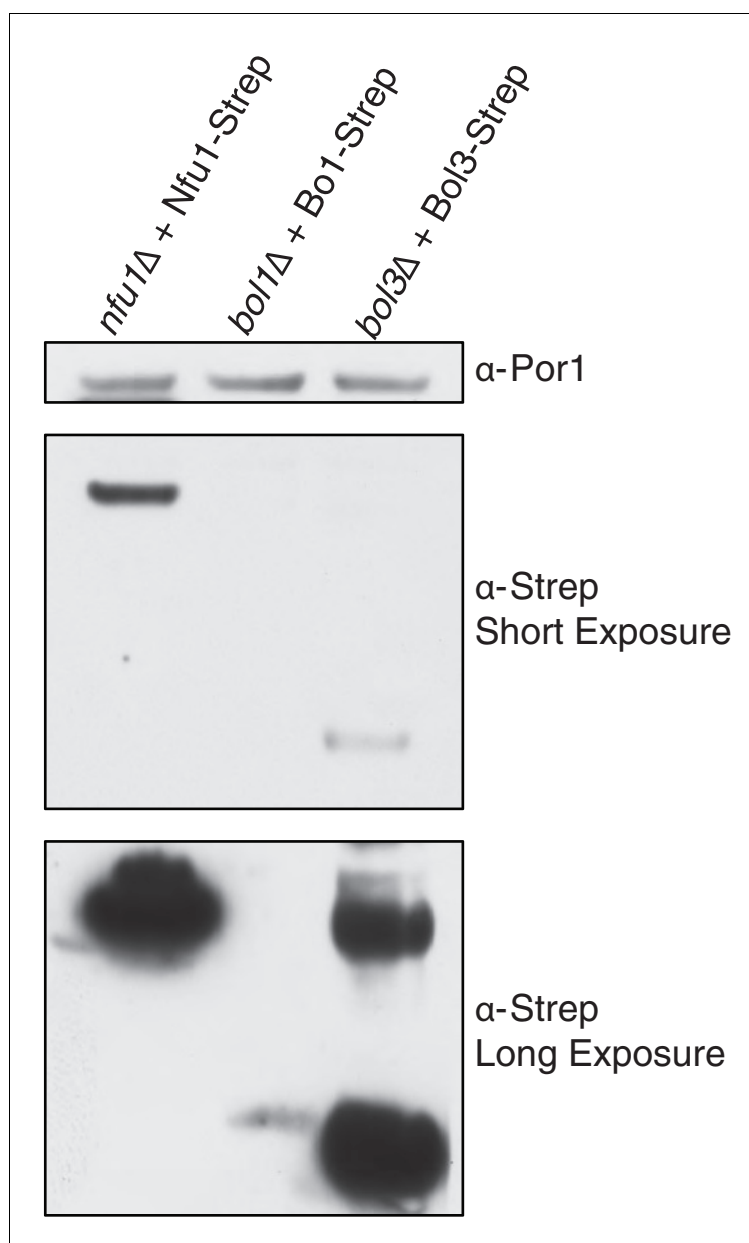

**Figure 6—figure supplement 1.** SDS-PAGE followed by immunoblotting to evaluate the different steady state levels of Nfu1-Strep, Bol1-Strep, and Bol3-Strep while being expressed under the same heterologous *MET25* promoter and *CYC1* terminator.

DOI: [10.7554/eLife.15991.015](https://doi.org/10.7554/eLife.15991.015)

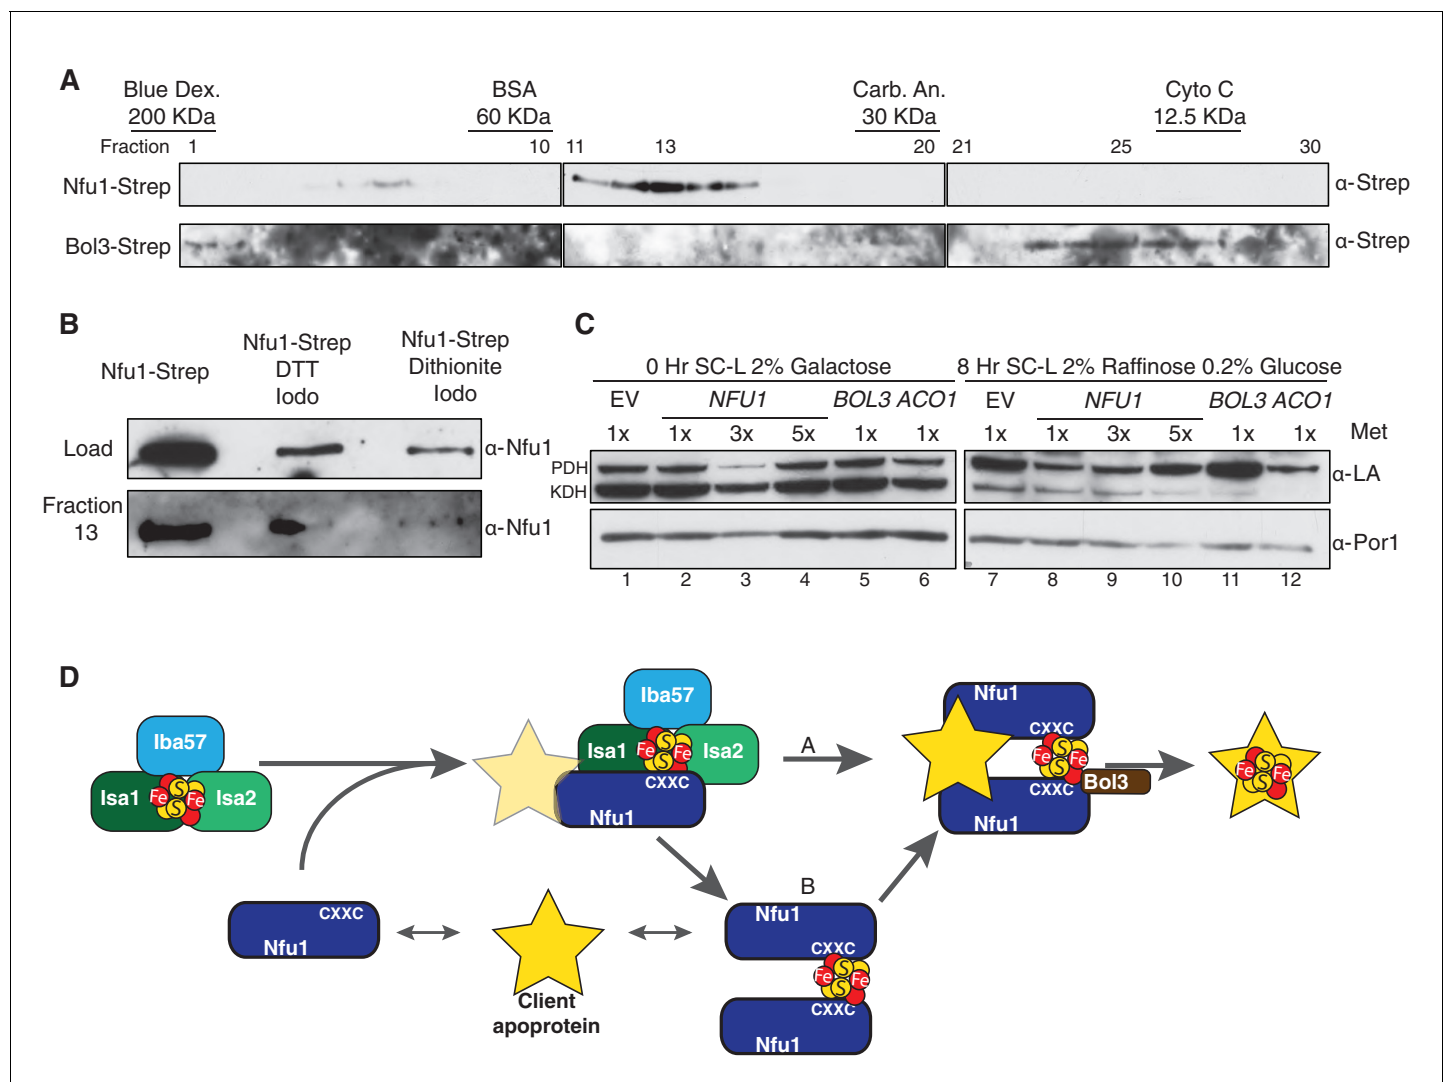

**Figure 7.** Nfu1 exists as a dimer bridged by a Fe-S cluster. (A) Immunoblotting of fractions from *nfu1Δ* + Nfu1-Strep or *bol3Δ* + Bol3-Strep lysates separated by size exclusion chromatography. Molecular weight standards [bovine serum albumin (BSA), carbonic anhydrase (CA) and cytochrome c] are displayed above the corresponding fractions were used to create a standard curve to calculate apparent molecular weights. Fraction 13 has an apparent molecular weight of 47.6 KDa and Fraction 26 has an apparent molecular weight of 13.2 kDa. (B) Immunoblotting of fraction 13 from *nfu1Δ* + Nfu1-Strep lysates pretreated with nothing, 100 mM DTT followed by 200 mM iodoacetamide, or 2 mM dithionite followed by 200 mM iodoacetamide were separated by size exclusion chromatography. (C) GAL-*NFS1* shutdown was induced over 8 hr with over-expression of *NFU1*, *BOL3*, and *ACO1* and LA levels were observed by immunoblotting. Nfu1 protein levels were reduced with increasing amounts of methionine by utilizing a *MET25* promoter is repressed with excess methionine (1x = 0.6 mM methionine). (D) A working model of late stage mitochondrial iron-sulfur cluster biogenesis and delivery. Two potential pathways of cluster transfer are shown in A and B.

DOI: [10.7554/eLife.15991.016](https://doi.org/10.7554/eLife.15991.016)
