# Supplementary figures and images for: Role of Nfu1 and Bol3 in iron-sulfur cluster transfer to mitochondrial clients
Source: eLife journal article supplement (doi:10.7554/elife.15991), 2016-08-17

Figure 3-figure supplement 1

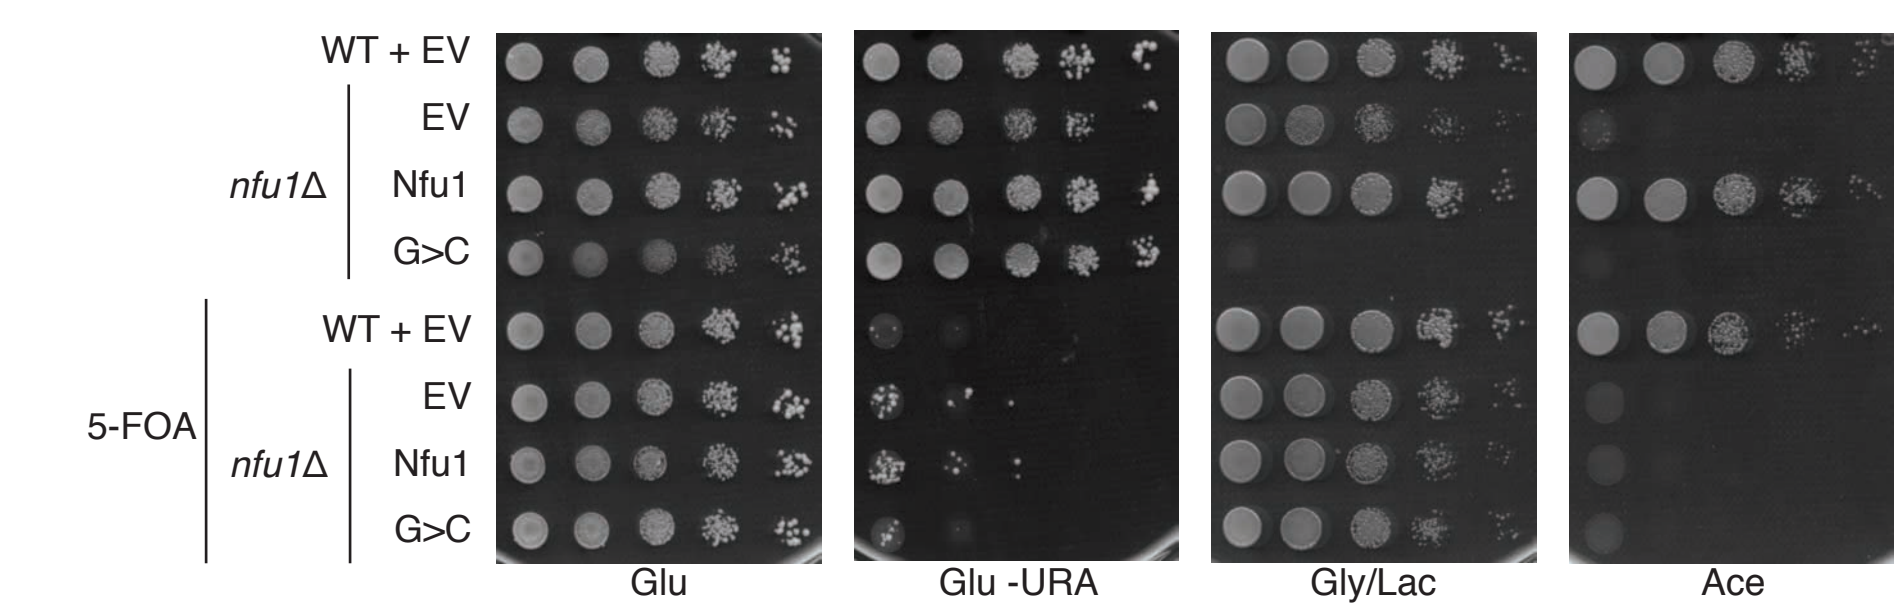

Supplement: supp [file elife_poa_e15991_Figure_3_figure_supplement_1.pdf › elife_poa_e15991_Figure_3_figure_supplement_1.pdf]

Figure 3-figure supplement 2

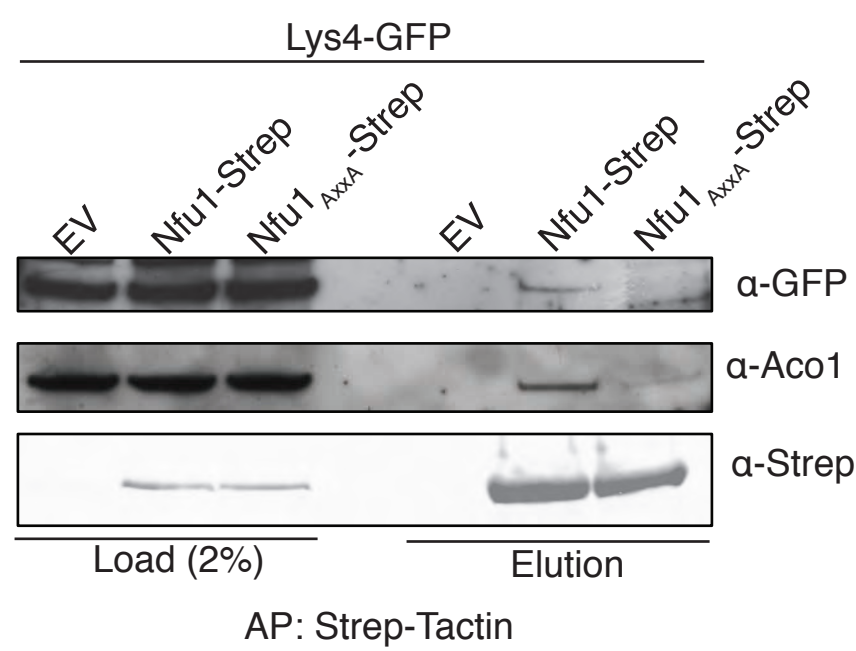

Supplement: supp [file elife_poa_e15991_Figure_3_figure_supplement_2.pdf › elife_poa_e15991_Figure_3_figure_supplement_2.pdf]

Figure 4-figure supplement 1

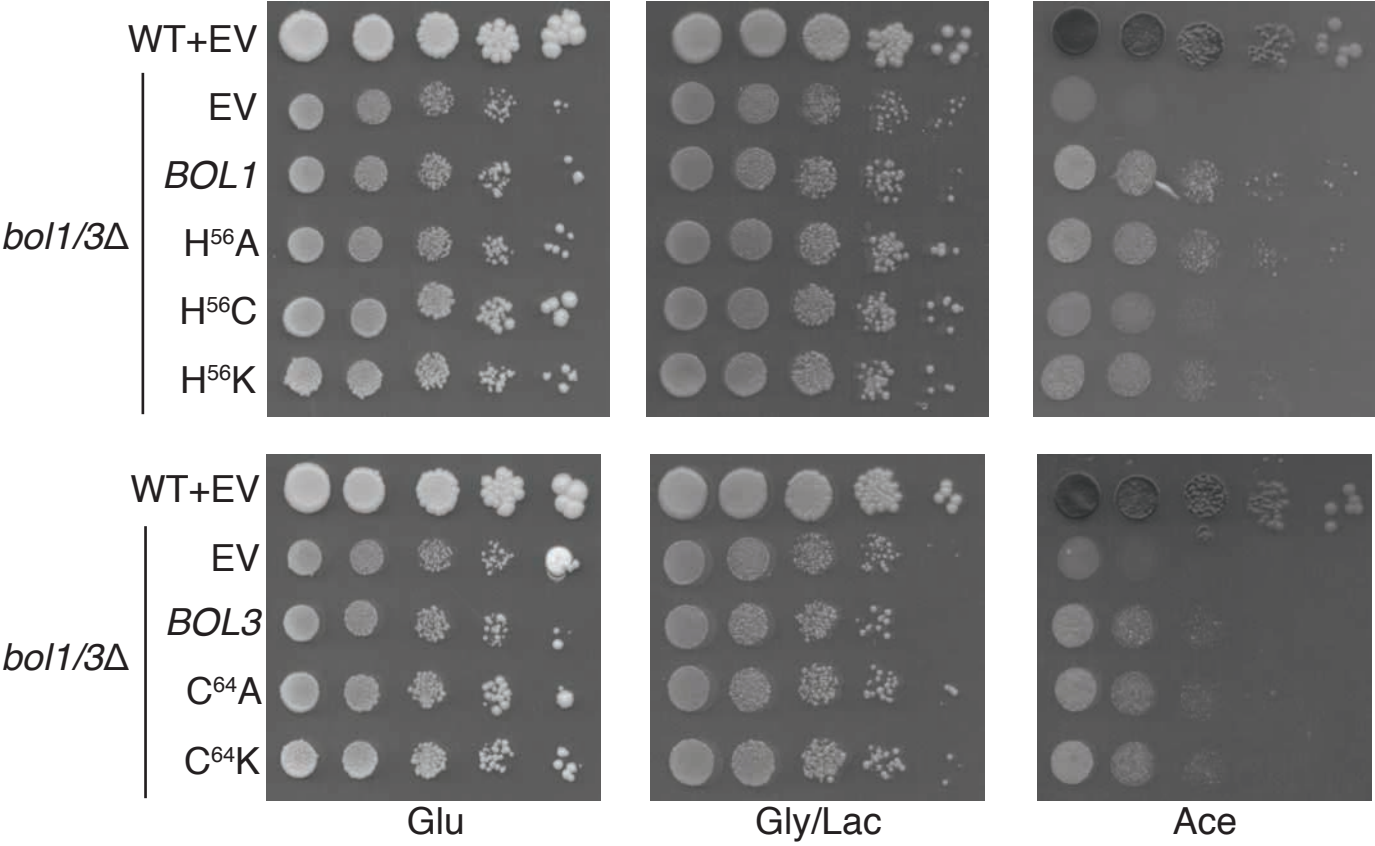

Supplement: supp [file elife_poa_e15991_Figure_4_figure_supplement_1.pdf › elife_poa_e15991_Figure_4_figure_supplement_1.pdf]

Figure 5-figure supplement 1

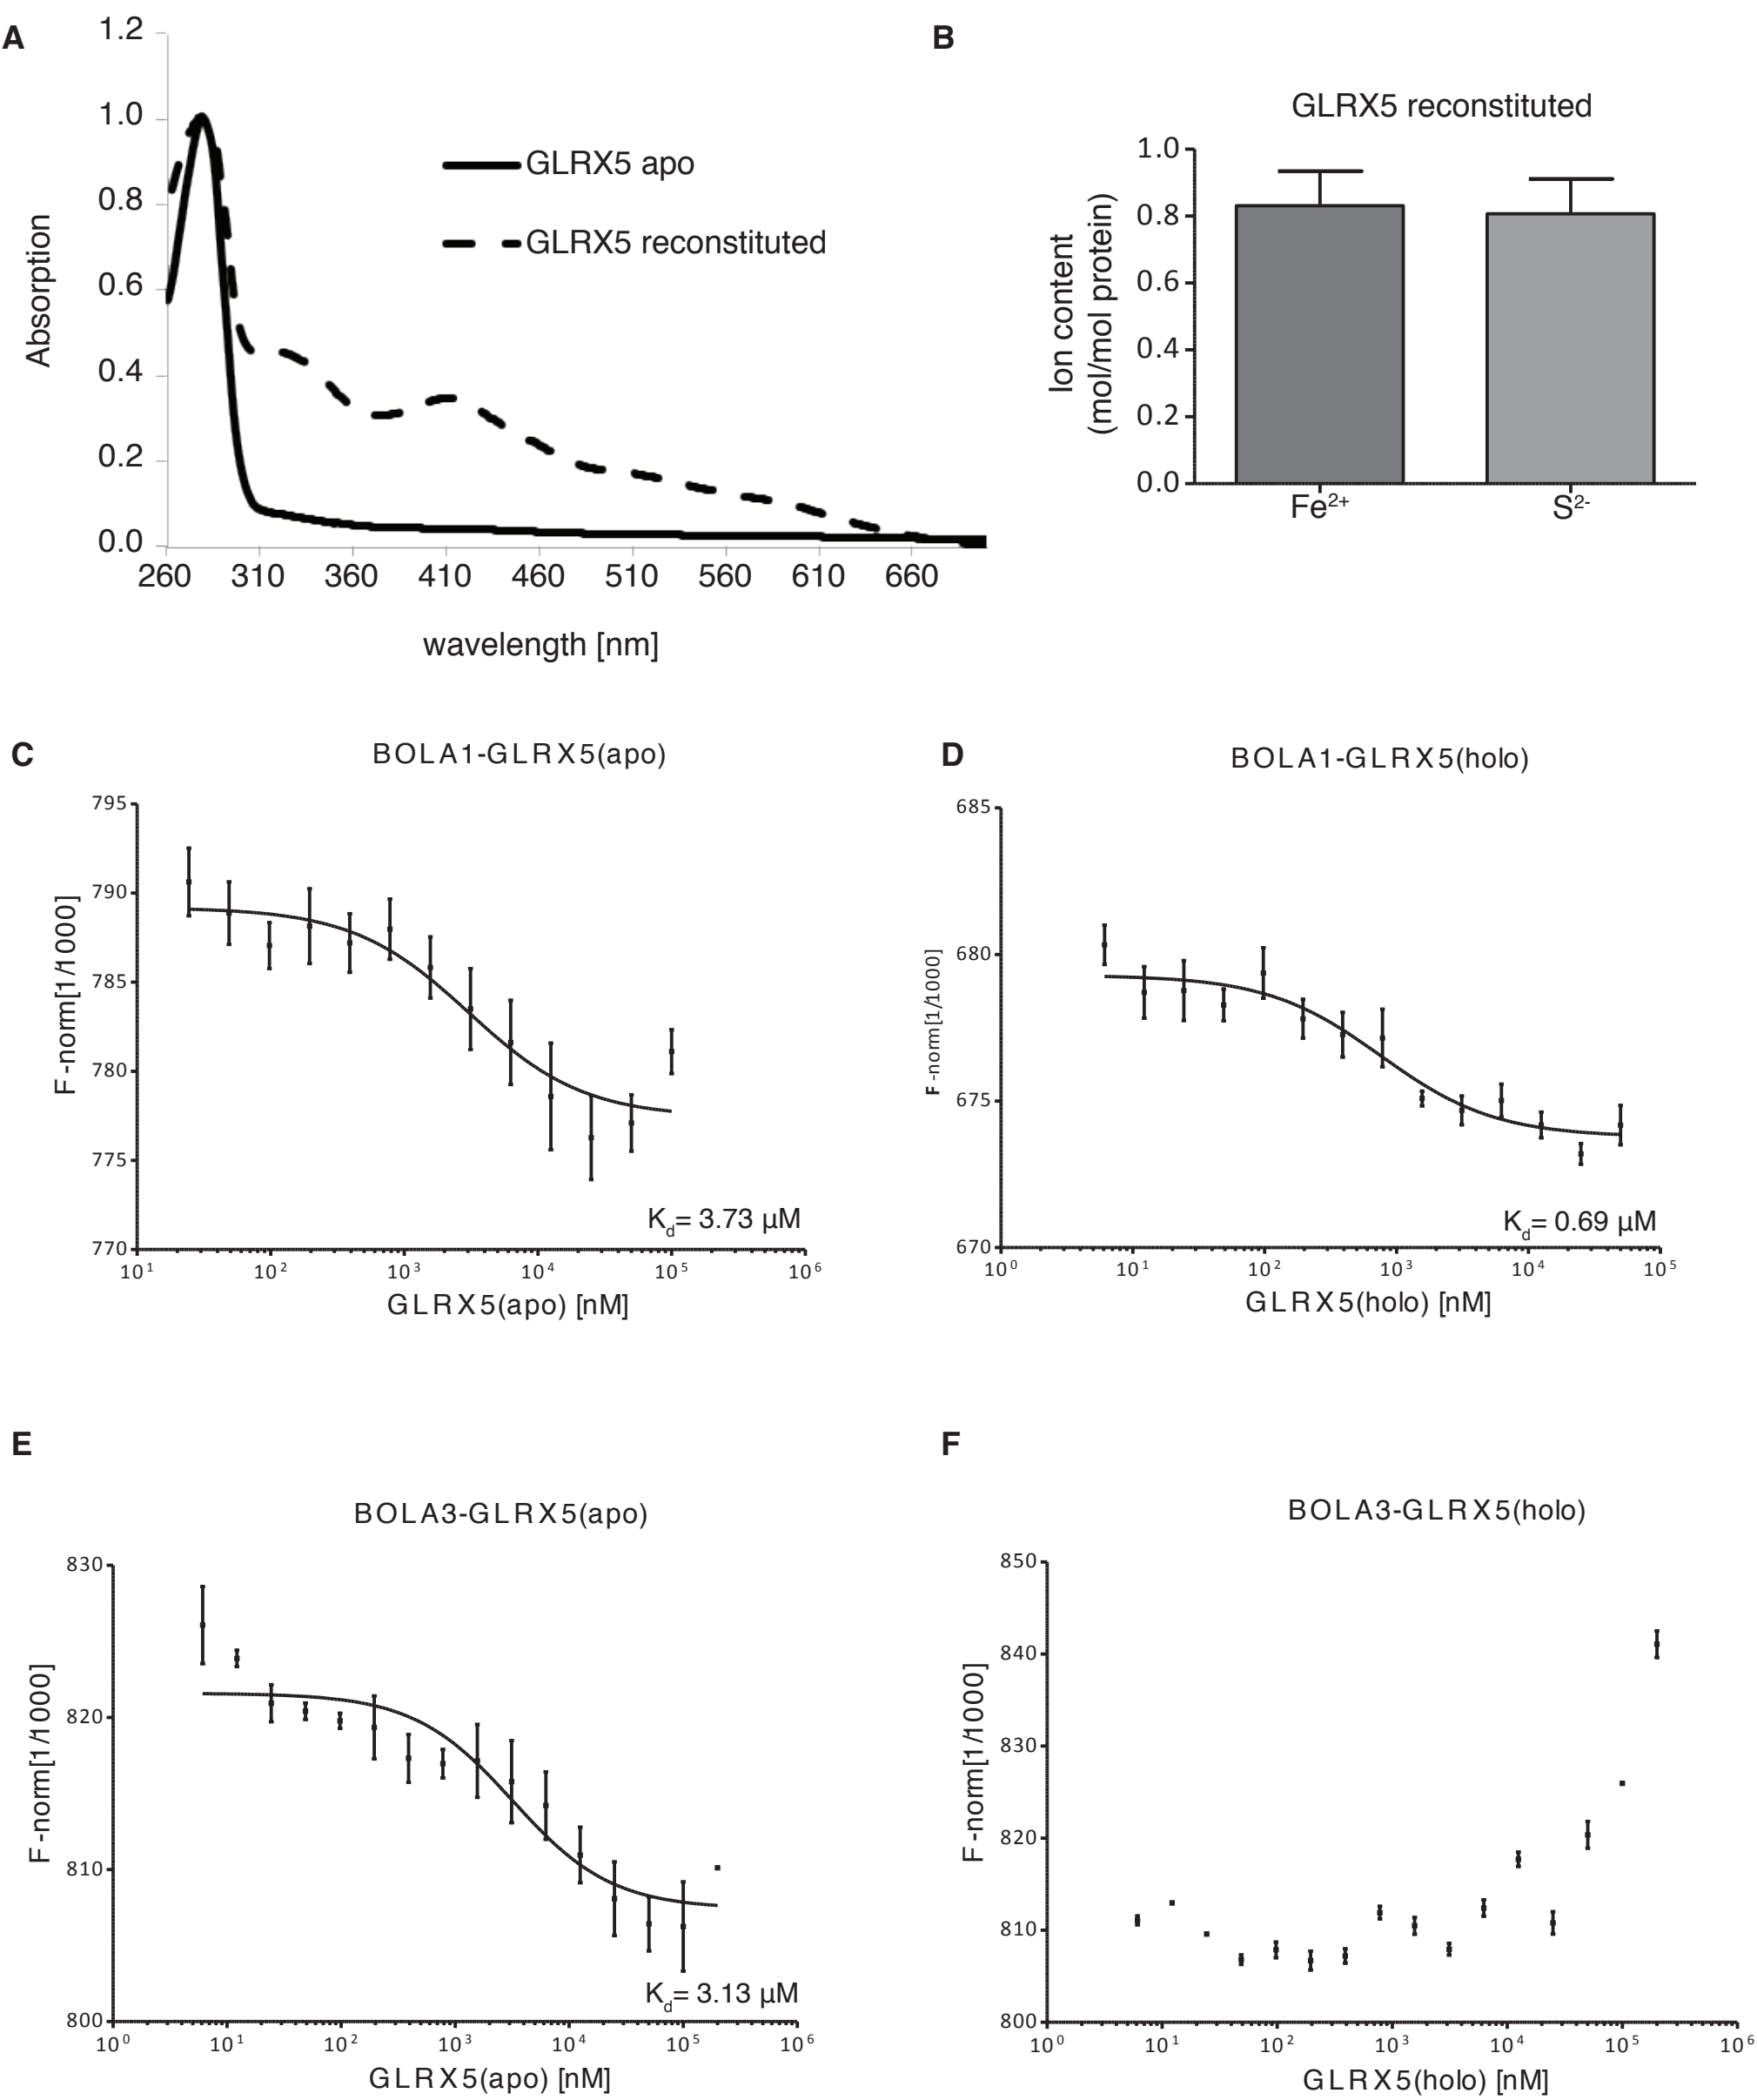

Supplement: supp [file elife_poa_e15991_Figure_5_figure_supplement_1.pdf › elife_poa_e15991_Figure_5_figure_supplement_1.pdf]

Figure 5-figure supplement 2

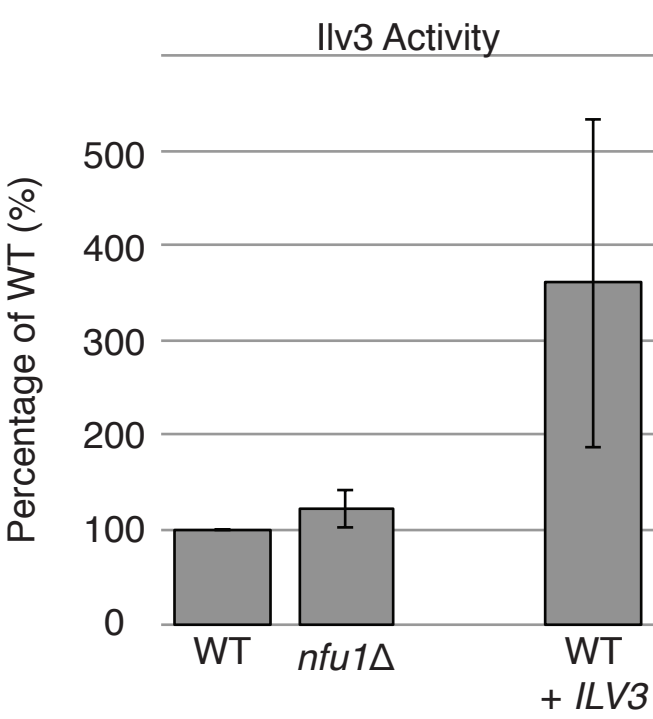

Supplement: supp [file elife_poa_e15991_Figure_5_figure_supplement_2.pdf › elife_poa_e15991_Figure_5_figure_supplement_2.pdf]

Figure 6-figure supplement 1

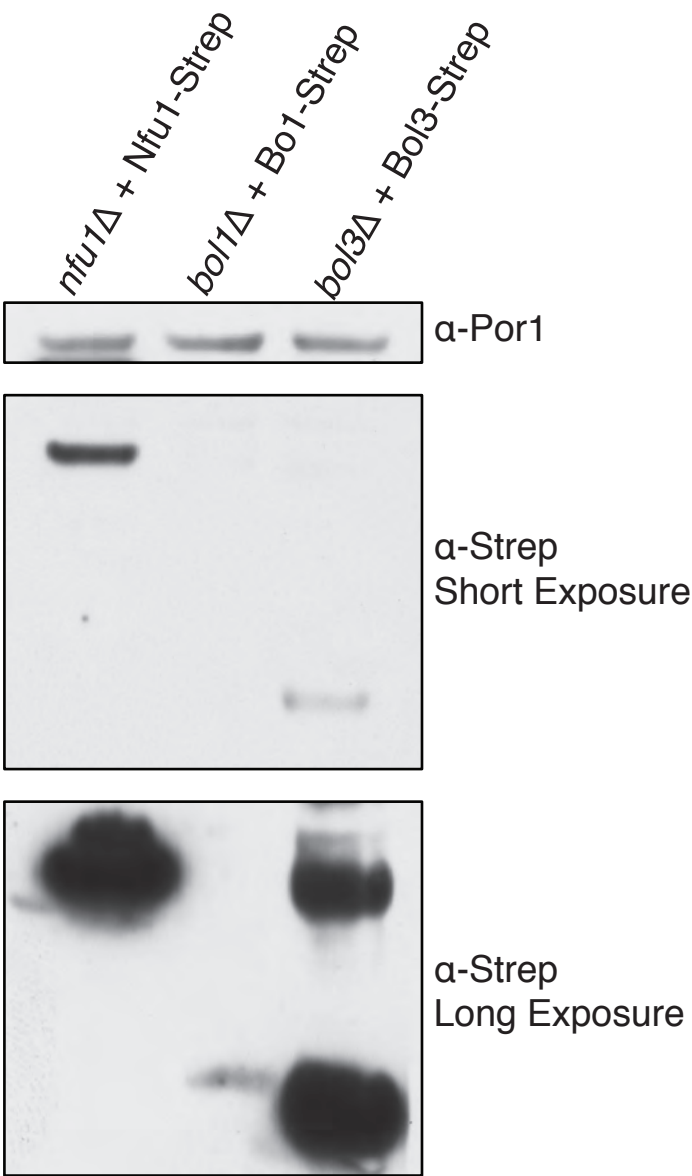

Supplement: supp [file elife_poa_e15991_Figure_6_figure_supplement_1.pdf › elife_poa_e15991_Figure_6_figure_supplement_1.pdf]
